1  
2  
3  
4  
5  
6  
7  
8  
9  
10  
11  
12  
13  
14  
15  
16  
17  
18

BET family members Bdf1/2 modulate global transcription initiation and elongation in *Saccharomyces cerevisiae*

Rafal Donczew<sup>1</sup> and Steven Hahn<sup>1,\*</sup>

<sup>1</sup>Fred Hutchinson Cancer Research Center, Division of Basic Sciences, 1100 Fairview Ave N. A1-162, Seattle, WA 98109

\*Correspondence: email: [shahn@fredhutch.org](mailto:shahn@fredhutch.org), phone: 206 667 5261

## 19 **Abstract**

20 Human bromodomain-containing BET family members are promising targets for therapy of cancer and  
21 immunoinflammatory diseases, but their mechanisms of action and functional redundancies are poorly  
22 understood. Bdf1/2, yeast homologues of the human BET factors, were previously proposed to target  
23 transcription factor TFIID to acetylated histone H4, analogous to bromodomains that are present within  
24 the largest subunit of metazoan TFIID. We investigated the genome-wide roles of Bdf1/2 and found that  
25 their important contributions to transcription extend beyond TFIID function, as transcription of many  
26 genes is more sensitive to Bdf1/2 than to TFIID depletion. Bdf1/2 co-occupy the majority of yeast  
27 promoters and affect preinitiation complex formation through recruitment of TFIID, Mediator and basal  
28 transcription factors to chromatin. Surprisingly, we discovered that hypersensitivity of genes to Bdf1/2  
29 depletion results from combined defects in transcription initiation and processive elongation, a striking  
30 functional similarity to human BET proteins, most notably Brd4. Our results establish Bdf1/2 as critical  
31 for yeast transcription and provide important mechanistic insights into the function of BET proteins in all  
32 eukaryotes.

33

## 34 **Introduction**

35 Bromodomains (BDs) are reader modules that allow protein targeting to chromatin via interactions with  
36 acetylated histone tails. BD containing factors are usually involved in gene transcription and their  
37 deregulation has been implicated in a spectrum of cancers and immunoinflammatory and neurological  
38 conditions (Fujisawa and Filippakopoulos, 2017; Wang et al., 2021). The bromo and extra-terminal  
39 (BET) family is characterized by the presence of a double BD, which has the highest affinity towards  
40 hyperacetylated histone H4, and an ET domain that interacts with non-histone proteins (Rahman et al.,  
41 2011; Slaughter et al., 2021). BET bromodomain inhibitors have shown promising results in treating  
42 both blood cancers and solid tumors (Stathis and Bertoni, 2018). Early studies implicated mammalian  
43 BET proteins in regulation of selected lineage-specific genes (Delmore et al., 2011; Lovén et al., 2013),  
44 however, it has become clear that their regulatory roles extend to the majority of genes transcribed by  
45 RNA Polymerase II (Pol II) (Muhar et al., 2018; Winter et al., 2017).

46

47 While most mammalian tissues express three BET factors (Brd2, Brd3, Brd4) (Uhlén et al., 2015), many  
48 studies have implicated Brd4 as most important for widespread changes in transcription after BET  
49 inactivation (Muhar et al., 2018; Zheng et al., 2021; Zuber et al., 2011). These broad genome-wide  
50 expression defects are due to the important roles of Brd4 in both transcription initiation and elongation.  
51 Brd4 contributes to recruitment of the transcription coactivator Mediator to enhancers and promoters  
52 and cooperates with Mediator in forming nuclear condensates at actively transcribed regions (Bhagwat

53 et al., 2016; Han et al., 2020; Sabari et al., 2018). Brd4 is also important for productive transcription  
54 elongation but it is unclear what mechanisms are involved. Brd4 associates with the positive  
55 transcription elongation factor b (P-TEFb), but no global defects in P-TEFb recruitment to chromatin  
56 were observed following inactivation of Brd4 or all BET factors (Muhar et al., 2018; Winter et al., 2017).  
57 Proposed alternative mechanisms of elongation control include release of P-TEFb inhibition, histone  
58 chaperone activity, or direct kinase activity (Devaiah et al., 2012; Itzen et al., 2014; Kanno et al., 2014).  
59 Finally, Brd4 was shown to affect preinitiation complex (PIC) formation at promoters, although its roles  
60 in later stages of transcription are believed to be dominant (Kanno et al., 2014; Winter et al., 2017).

61  
62 TFIID is a conserved Pol II factor that, in yeast, regulates transcription of almost all Pol II-transcribed  
63 genes (Donczew et al., 2020; Huisinga and Pugh, 2004; Warfield et al., 2017). TFIID is comprised of  
64 TBP (TATA binding protein) and 13-14 Tafs (TBP associated factors). TFIID acts as a TBP-DNA loading  
65 factor, a promoter recognition factor and a molecular scaffold guiding PIC assembly (Patel et al., 2020).  
66 Recruitment of metazoan TFIID to promoters is thought to be aided by interactions between two Taf  
67 subunits and chromatin marks that are enriched at the +1 nucleosome. The human Taf1 double BD and  
68 Taf3 PHD domain recognize acetylated histone H4 tails and trimethylated histone H3 lysine 4,  
69 respectively (Jacobson et al., 2000; van Ingen et al., 2008). In contrast, Taf1 and Taf3 in budding yeast  
70 are missing both of these chromatin readers as well as recognizable promoter DNA sequence motifs  
71 such as the INR and DPE that are known to interact with metazoan Tafs (Patel et al., 2020).

72  
73 Yeast BET family member Bdf1 and its paralogue Bdf2 are genetically redundant, with at least one  
74 required for viability. Deletion of *BDF1* but not *BDF2* results in growth retardation, suggesting a  
75 dominant role for Bdf1 (Matangkasombut et al., 2000). Bdf1 binds Taf7 and recognizes acetylated  
76 histone H4. Both of these functions are required to support cell growth and transcription at several loci.  
77 Based on these findings, it was proposed that Bdf1 double BD substitutes for the missing BDs of yeast  
78 Taf1, linking yeast TFIID to promoter-enriched chromatin marks (Matangkasombut et al., 2000;  
79 Matangkasombut and Buratowski, 2003). Gene deletion or targeted depletion of Bdf1 revealed a small  
80 contribution of Bdf1 to Taf1 recruitment genome-wide with a bias towards a group of genes classified  
81 as “TFIID-dominated” and led to a modest defect in transcription at a limited gene set (Durant and Pugh,  
82 2007; Joo et al., 2017; Ladurner et al., 2003).

83  
84 By applying degron-mediated protein depletion and monitoring nascent mRNA levels, we recently  
85 showed that yeast protein-coding genes can be classified into two broad categories based on  
86 transcription changes after rapid depletion of the coactivators TFIID and SAGA (Donczew et al., 2020).  
87 We found that the majority of yeast genes are strictly TFIID-dependent while a subset, which we termed

88 coactivator-redundant (CR) genes, are co-regulated by TFIID and SAGA. This latter category overlaps  
89 ~50% with the gene set earlier termed “SAGA-dominated” (Huisinga and Pugh, 2004). In contrast, long-  
90 term ablation of SAGA via gene deletions showed that nearly all yeast genes are dependent on  
91 chromatin modifications directed by SAGA. However, the molecular basis for the TFIID and CR gene  
92 classes remains unknown. For example, it’s not known if there are other factors that preferentially  
93 participate in the TFIID or SAGA-directed pathways.

94  
95 Here, we have examined the functions of Bdf1 and Bdf2 in yeast transcription and we found broad  
96 genome-wide roles for the Bdfs in both transcription initiation and elongation. Rapid Bdf depletion  
97 strongly decreases transcription from the TFIID-dependent genes and, at many genes, the Bdfs are  
98 more important than Tafs for normal levels of transcription. The Bdfs contribute to PIC formation and  
99 TFIID and Mediator recruitment to gene regulatory regions. In addition, at many genes, the Bdfs also  
100 regulate transcription elongation and this role contributes to the strong defects in mRNA synthesis upon  
101 Bdf depletion. These striking functional similarities with mammalian BET factors suggest broad  
102 conservation of BET function in eukaryotes.

103

## 104 **Results**

### 105 **Transcription of most TFIID-dependent genes is more sensitive to Bdf1/2 than to TFIID depletion**

106 A limitation of previous studies on Bdf1/2 function was that both proteins could not be simultaneously  
107 eliminated since at least one Bdf is required for viability. In this study, we used the auxin-degron system  
108 (Nishimura et al., 2009) to achieve rapid depletion of Bdf1, Bdf2, or simultaneous depletion of both  
109 proteins, and used 4-thioU RNA-seq to monitor changes in newly-synthesized mRNA (Donczew et al.,  
110 2020; Rabani et al., 2011). We first assessed protein degradation after a 30-minute treatment with the  
111 auxin indole-3-acetic acid (IAA) (**Figure S1A**). Bdf1 was efficiently degraded with <10% of protein  
112 remaining in IAA treated samples. Bdf2 degradation was less complete, with ~15% of protein remaining,  
113 so we prepared a *bdf2* deletion strain combined with a Bdf1 degron (Bdf1,  $\Delta bdf2$ ). Growth of all strains  
114 with Bdf derivatives was similar to wild type (**Figure S1B**) and analysis of 4-thioU mRNA levels in control  
115 DMSO-treated cultures showed that changes in transcription due to these genetic alterations were  
116 minimal (**Figure S1C**).

117

118 Experiments were done in two or three biological replicates and the variation in nascent mRNA levels  
119 between replicate samples was <30% for nearly all experiments (**Figure S1D and Table S2**). Bdf2  
120 degradation or *bdf2* deletion showed minimal changes in transcription while Bdf1 degradation resulted  
121 in modest defects, in agreement with the genetic phenotypes of *BDF1/2* mutants (**Figures 1A and S1E**

122 **and Table S2**). Strikingly, depletion of both Bdf1 and Bdf2, either through a double degron or by  
123 combining a *bdf2* deletion with a Bdf1 degron, resulted in a global collapse of transcription with median  
124 decreases of ~4-fold and ~5.4-fold, respectively (**Figures 1A and S1F and Table S2**). Transcriptional  
125 changes in both Bdf1/2 depletion experiments are highly correlated ( $r = 0.95$ ) (**Figure S1G**). The results  
126 of the Bdf1 and Bdf1/2 depletion experiments also correlate ( $r = 0.82$ ), showing redundant roles of Bdf1  
127 and Bdf2 in transcription (**Figure S1H**). We compared results of the Bdf depletion experiment with  
128 previously published results of rapid Taf1 depletion (Donczew et al., 2020). Surprisingly, we observed  
129 that transcription changes upon Bdf or Taf1 depletion correlate but the relationship between them is not  
130 linear (**Figure 1B**). Labeling the points based on the TFIID and CR gene categories revealed that genes  
131 less sensitive to Bdf depletion (on the right of the diagonal line) include almost all coactivator-redundant  
132 (CR) genes and one third of TFIID-dependent genes. Interestingly, most of the TFIID-dependent genes  
133 (68%) are more sensitive to Bdf than Taf1 depletion and, for 12% of them, the difference is 4-fold or  
134 higher (**Table S2**). This result shows that, while Bdfs likely act in conjunction with TFIID at many  
135 promoters, Bdfs also have important TFIID-independent contributions to transcription of many genes.  
136 Comparison of the Bdf results with depletion of Taf13, another TFIID subunit, leads to similar  
137 conclusions (**Figure S1I**).

138  
139 Ribosomal protein (RP) genes are frequently analyzed as a separate gene category due to high  
140 expression levels, common regulatory mechanisms, and important roles in cell growth and stress  
141 response (Zencir et al., 2020). About 95% of RP genes belong to the TFIID-dependent class (Donczew  
142 et al., 2020; Huisinga and Pugh, 2004). Surprisingly, we found that nearly all RP genes are significantly  
143 less dependent on Bdf1/2 compared with TFIID, an uncommon feature for TFIID-dependent genes  
144 (**Figure S1J**).

145  
146 With many TFIID-dependent genes losing >85% of detectable transcription after Bdf1/2 depletion, we  
147 investigated how these changes compare to defects caused by depletion of basal components of the  
148 preinitiation complex (PIC). We depleted basal factors with degron tags on either TFIIA subunit Toa1  
149 or the TFIIH translocase subunit Ssl2 followed by 4-thioU RNA-seq. The results are summarized in a  
150 boxplot divided into CR and TFIID-dependent genes (**Figure 1C and Table S2**). Depletion of Toa1 or  
151 Ssl2 decreases all mRNA transcription independent of gene class with median changes of ~15-fold and  
152 ~23-fold, respectively. Interestingly, 38% and 19% of TFIID-dependent genes are similarly sensitive to  
153 Toa1 or Ssl2 depletion as they are to Bdf depletion. Combined, our results show that Bdf dependence  
154 is as good or even a better classifier for the TFIID and CR gene classes than Taf-dependence.  
155 Transcription at many TFIID-dependent genes is severely compromised in the absence of Bdfs while  
156 transcription of CR genes is only weakly affected (**Figure 1C**).

157

158 Bdf1 is also a subunit of the SWR1 complex that incorporates the histone variant H2A.Z into promoter-  
 159 proximal nucleosomes (Krogan et al., 2003; Zhang et al., 2005). We used the degron system to rapidly  
 160 deplete H2A.Z and check if the loss of transcription after Bdf depletion is mediated by defects in H2A.Z  
 161 deposition (**Figure S1K**). RNA-seq analysis did not reveal significant defects in gene transcription  
 162 following the rapid loss of H2A.Z (**Figure S1L and Table S2**), suggesting that the global transcriptional  
 163 defects upon Bdf depletion are not mediated via SWR1 and H2A.Z.

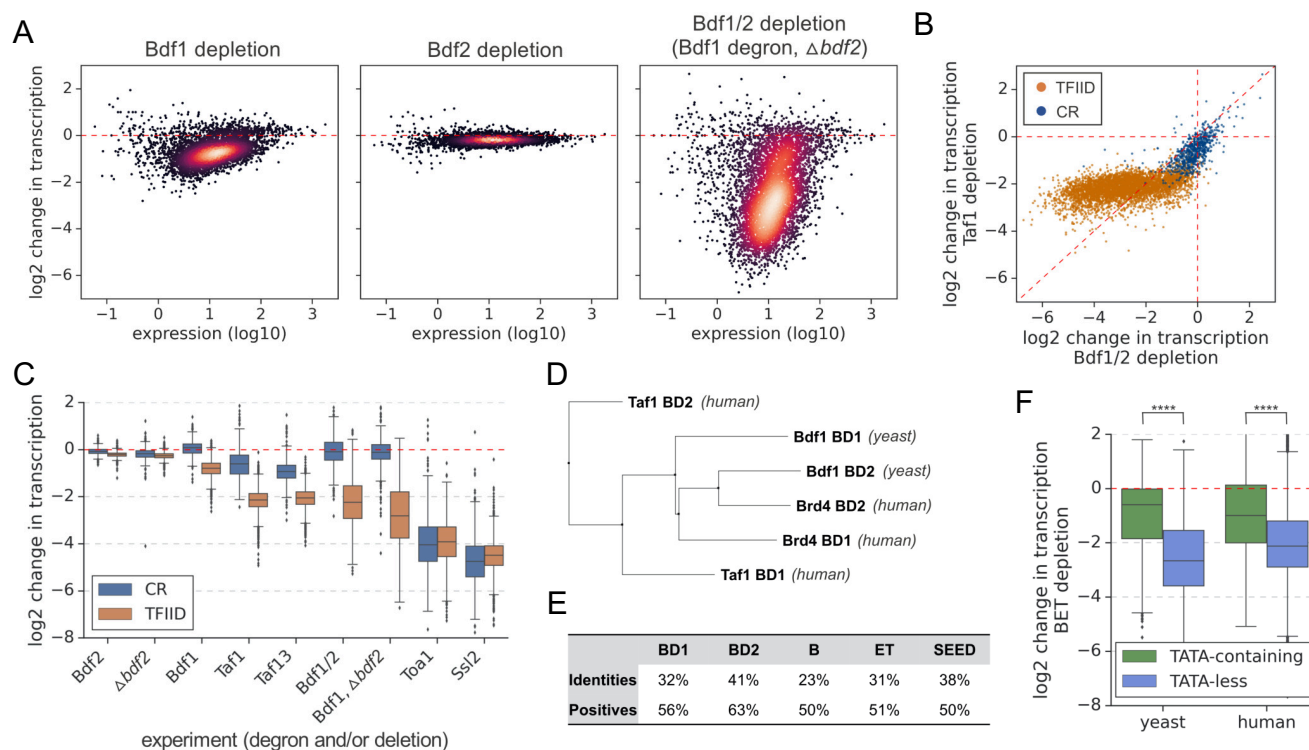

**Figure 1. Many genes are more sensitive to Bdf1/2 than to TFIID depletion.** (A) Transcriptional changes caused by degron depletion of Bdf1/2 for 30 min. Scatter plots comparing expression level (in log scale) with log<sub>2</sub> change in transcription per gene measured by 4-thioU RNA-seq. Mean values from replicate experiments are plotted for 5313 genes with detectable signals in all RNA-seq samples collected in this work. (B) Scatter plot comparing log<sub>2</sub> change in transcription after depleting Bdf1/2 (this work) or Taf1 (Donczew et al., 2020). Data for 4883 genes classified into TFIID-dependent and coactivator-redundant (CR) categories are shown (Donczew et al., 2020). (C) Boxplot showing log<sub>2</sub> change in transcription for 4883 genes measured by 4-thioU RNA-seq after depleting indicated factors. Genes are grouped into TFIID-dependent and CR categories. (D) Phylogenetic analysis of amino acid sequences of individual bromodomains from human Taf1, human Brd4 and yeast Bdf1. (E) BLAST global alignment of amino acid sequences within indicated domains of Bdf1 and Brd4. (F) Boxplot showing log<sub>2</sub> change in transcription after depleting BET factors in yeast (this work) or human cells (Winter et al., 2017). Genes are classified depending on the presence of a consensus TATA box (TATAWAW) in their promoter. A list of TATA-containing promoters in human cells was obtained from Eukaryotic Promoter Database (EPD). A single, most representative promoter per gene was used in this analysis. Results of the Welch's t-test are shown. The asterisks represent p-value with the following cut-off levels: \*\*\*\* - 0.0001, \*\*\* - 0.001, \*\* - 0.01, \* - 0.05, ns - >0.05. See also Figures S1 and S2 and Tables S2 and S3.

164

165 **Bdf1/2 share significant similarities with human BET factors**

166 Bdf1 was initially proposed to constitute a missing part of yeast Taf1 (Matangkasombut et al., 2000),  
167 but later work classified Bdf1/2 as members of the BET family based on a conserved domain  
168 organization (Wu and Chiang, 2007) (**Figure S2A**). Since Bdfs have important TFIID-independent  
169 functions at many genes, we explored similarities between yeast and human BET proteins. Multiple  
170 sequence alignment and phylogenetic analysis of individual bromodomains (BDs) of Bdf1, Brd4 and  
171 human Taf1 (hTaf1) revealed that Bdf1 BDs, especially BD2, are more closely related to Brd4 than  
172 hTaf1 BDs (**Figures 1D and S2B**). Other conserved domains of Bdf1 and Brd4 show  $\geq 50\%$  similarity  
173 (**Figure 1E**). We next compared gene-specific responses to Bdf/BET depletion in yeast and human  
174 cells. We used a published RNA-seq dataset from an experiment where BET factors were targeted with  
175 the chemical degrader dBET6 in the MOLT4 leukemia cell line (Winter et al., 2017) (**Table S2**). Since  
176 the CR/TFIID-dependent classes are biased for TATA-containing/TATA-less categories (Donczew et  
177 al., 2020; Huisinga and Pugh, 2004) we divided yeast and human genes into two categories based on  
178 the presence or absence of a consensus TATA box. We found that TATA-less genes in both systems  
179 were significantly more affected by Bdf/BET depletion than TATA-containing genes (**Figure 1F**). Finally,  
180 in the 25% most affected genes in each dataset, we observed an extensive overlap in major gene  
181 ontology terms (**Figure S2C and Table S3**). Altogether, these results suggest a common biological role  
182 of BET factors in yeast and human cells, a conclusion supported by other results presented below.

183

184 **Bdf1/2 and Taf1 have similar genome-wide binding patterns**

185 We recently mapped Taf1 and other TFIID subunits using an improved ChEC-seq method, where DNA  
186 cleavage by protein-MNase fusions is applied to map genome-wide binding (Donczew et al., 2021,  
187 2020). TFIID is detectable at over 3000 yeast promoters and is found at both TFIID-dependent and CR  
188 genes, which agrees with its general role in transcriptional regulation. We used ChEC-seq to map Bdf1  
189 and Bdf2 binding genome-wide. Comparison of Bdf1/2 and Taf1 ChEC-seq showed similar binding  
190 patterns with broad peak spanning between -1 and +1 nucleosomes and signals extending into the  
191 gene body, especially for Bdf1 (**Figures 2A and S3A**). We identified 3700, 3466 and 3103 promoters  
192 bound by Bdf1, Bdf2 and Taf1, respectively. Data for Bdf1 and Bdf2 confirm redundancy between both  
193 factors. There is an extensive overlap of promoters bound by both Bdfs and the signals at common  
194 bound promoters are highly correlated, although Bdf1 signals are consistently stronger, in agreement  
195 with its dominant role (**Figures 2B and S3B and Table S4**). There is also extensive overlap between  
196 Bdf1 and Taf1 bound promoters (**Figure 2B**), although Bdf1 is found less frequently at CR genes  
197 (**Figure 2C**), consistent with the lesser role of Bdfs at this gene class. Importantly, for both classes of  
198 genes, the change in transcription after Bdf depletion significantly differs depending on the presence of  
199 a Bdf1 peak (**Figure S3C**). We validated Bdf1 binding using ChIP-seq as an orthogonal approach. The

200 results are similar to ChEC-seq as well as to previously published ChIP-exo data (**Figure S3D and**  
 201 **Table S4**) (Rhee and Pugh, 2012). The number of bound promoters detected by ChIP-seq is lower due  
 202 to worse signal to background ratio but shows a good overlap with ChEC-seq results (**Figure S3E**).

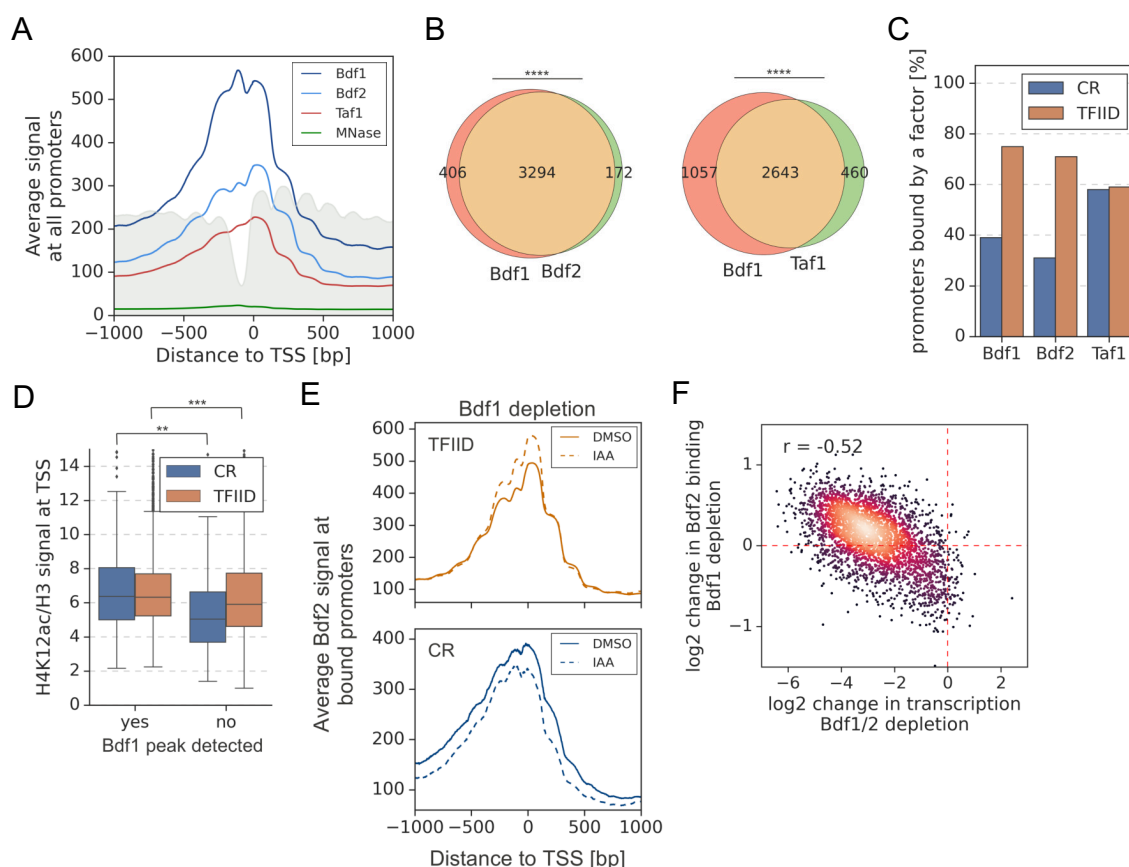

**Figure 2. A significant overlap between Bdf1/2 and Taf1 bound promoters.** (A) Average plot of Bdf1, Bdf2 and Taf1 ChEC-seq signals versus free MNase signal at 5888 yeast promoters. Published MNase-seq data are shown as a grey area plot (Oberbeckmann et al., 2019). Mean values from replicate experiments are plotted. (B) Venn diagrams showing the overlap of promoters bound by indicated factors. Results of the hypergeometric test are shown. The asterisks represent p-value with the following cut-off levels: \*\*\*\* - 0.0001, \*\*\* - 0.001, \*\* - 0.01, \* - 0.05, ns - >0.05. (C) Bar plot showing percentage of promoters in each class (TFIIID-dependent or CR) bound by a given factor. (D) Boxplot showing the H4K12ac signal at TSS normalized to H3 signal. Genes are grouped into TFIIID-dependent and CR categories and data are plotted separately depending on the presence of a significant Bdf1 peak. Signals were calculated in a -100 to +200 bp window relative to TSS. Published H3 ChIP-seq dataset was used for this analysis (Bruzzone et al., 2018). Results of the Welch's t-test are shown. (E) Average plot comparing Bdf2 ChEC-seq signal before (DMSO, solid line) and after (IAA, dashed line) Bdf1 depletion at 3223 promoters bound by Bdf2 and classified into TFIIID-dependent and CR categories. (F) Scatter plot comparing log<sub>2</sub> change in transcription and log<sub>2</sub> change in Bdf2 ChEC-seq occupancy after depleting Bdf1/2 or Bdf1, respectively. Spearman correlation coefficient (*r*) is shown. Bdf2 signal was calculated in a 200 bp window centered on a dominant peak assigned to 3223 promoters. See also Figure S3 and Table S4.

203  
 204



205 We also performed a Bdf2 ChIP-seq experiment, but the quality of the data was too low to call peaks.  
206 Instead, we calculated Bdf2 signal at promoters bound by Bdf1 and found that the signals correlate well,  
207 supporting conclusions obtained by ChEC-seq (**Figures S3B and S3F and Table S4**). However, a  
208 major difference between ChEC-seq and ChIP-seq was observed at the RP genes. We detected Bdf1  
209 binding at 15% of RP promoters using ChEC-seq, which is consistent with a limited role of Bdfs at RP  
210 genes. Conversely, almost all (94%) RP promoters have a significant Bdf1 ChIP signal, but this result  
211 is not predictive of Bdf1 function (**Figures S1J and S3G**).

212  
213 Next, we investigated whether Bdf1 binding correlates to histone H4 acetylation levels. We measured  
214 the genome-wide acetylation of H4 lysine 12 (H4K12ac), which was shown to be a preferred target for  
215 Bdf1 (Slaughter et al., 2021) (**Figure S3H**). Importantly, for both classes of genes, the normalized  
216 H4K12ac level at promoters significantly differs depending on the presence of a Bdf1 peak (**Figure 2D**  
217 **and Table S4**). To conclude, Bdf1 occupancy at promoters predicts higher H4K12ac levels and  
218 transcription dependence on Bdfs.

219  
220 It was earlier proposed that Bdf2 redistributes to preferred Bdf1 sites in a *bdf1* deletion strain (Durant  
221 and Pugh, 2007). We tested this hypothesis by measuring changes in Bdf1 or Bdf2 occupancy after  
222 depleting Bdf2 or Bdf1, respectively. Following Bdf1 depletion, the Bdf2 signal increases at TFIIID  
223 promoters at the expense of CR promoters (**Figure 2E**). The changes at individual promoters are  
224 relatively weak but they correlate well with gene dependence on Bdfs ( $r = -0.52$ ) (**Figure 2F and Table**  
225 **S4**). Conversely, Bdf1 does not redistribute in response to Bdf2 depletion (**Figure 3I and Table S4**).  
226 This result provides more evidence of redundancy between Bdf1 and Bdf2, with Bdf1 being the  
227 dominant factor and Bdf2 serving an auxiliary role.

### 228 229 **Bdf1 can be targeted to promoters independently of histone H4 acetylation**

230 Esa1, a catalytic subunit of the NuA4 complex, is almost exclusively responsible for acetylation of  
231 lysines 5, 8 and 12 on histone H4 in yeast (Chang and Pillus, 2009; Suka et al., 2001). We compared  
232 the roles of Esa1 and Bdfs in transcriptional regulation using an Esa1 degron strain. We used a 1-hour  
233 treatment with IAA, which allowed for a substantial loss of both H4K12ac and Esa1 (**Figure S4A**). 4-  
234 thioU RNA-seq analysis revealed a global loss of transcription after Esa1 depletion, which has a good  
235 but non-linear correlation with the Bdf experiment ( $r = 0.73$ ) (**Figures 3A, 3B and S4B and Table S2**).  
236 Importantly, Bdf depletion results in stronger transcriptional defects, suggesting that a portion of Bdf  
237 function is H4Ac independent. Our findings show that Bdf1/2, Esa1 and TFIIID cooperate in regulation  
238 of many genes but their contributions to transcription can be significantly different at individual genes  
239 (**Figures 3C and S4C and Table S2**).

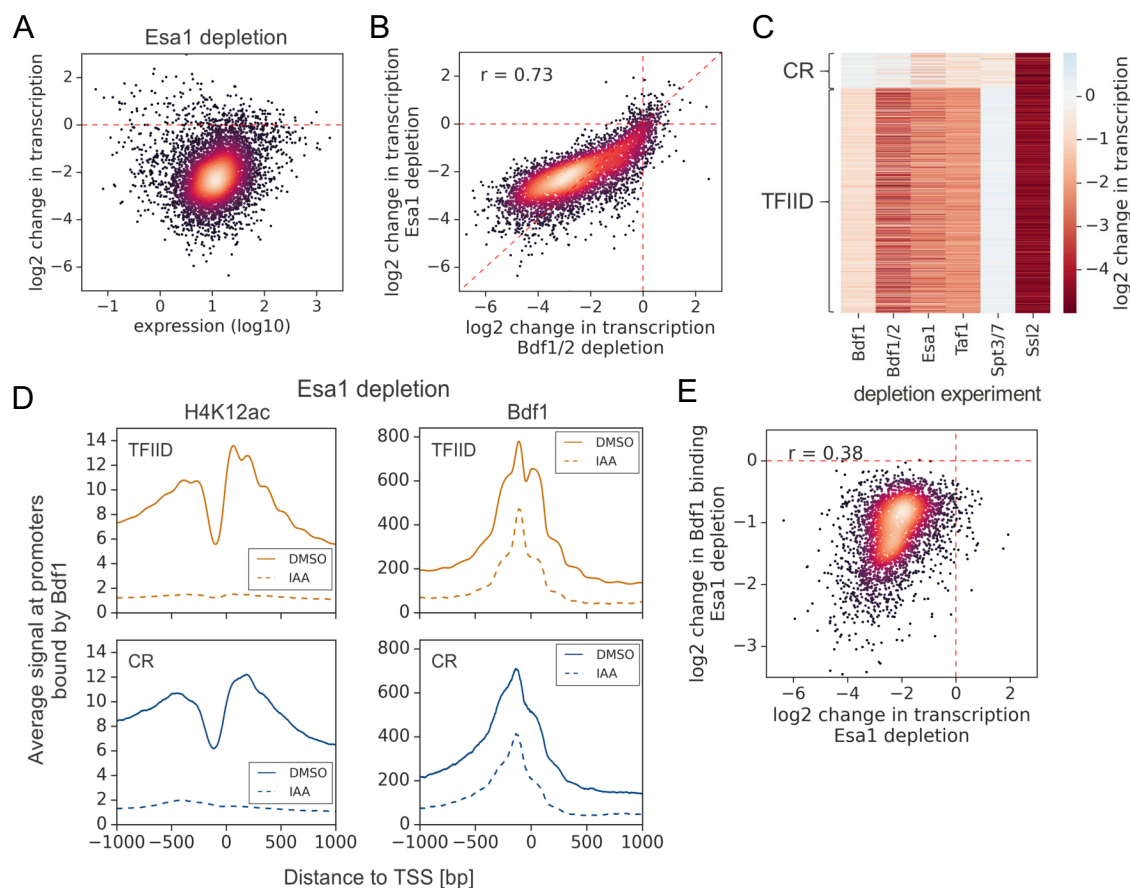

**Figure 3. Esa1 regulates similar set of genes as Bdf1/2 but is not essential for Bdf1 targeting to chromatin.** (A) Scatter plot comparing expression level (in log scale) with  $\log_2$  change in transcription per gene after depleting Esa1 for 60 min. Mean values from replicate experiments are plotted for 5313 genes with detectable signals in all RNA-seq samples collected in this work. (B) Scatter plot comparing  $\log_2$  change in transcription after depleting Bdf1/2 or Esa1. Spearman correlation coefficient ( $r$ ) is shown. Data for 4883 genes classified into TFIIID-dependent and CR categories are plotted. (C) Heatmap comparing results of indicated depletion experiments on transcription of 4883 genes. (D) Average plots comparing H4K12ac ChIP-seq and Bdf1 ChEC-seq signals before (DMSO, solid line) and after (IAA, dashed line) Esa1 depletion at 3426 promoters bound by Bdf1 and classified into TFIIID-dependent and CR categories. Mean values from replicate experiments are plotted. (E) Scatter plot comparing  $\log_2$  change in transcription and  $\log_2$  change in Bdf1 occupancy after depleting Esa1 at 3426 promoters. Spearman correlation coefficient ( $r$ ) is shown. Bdf1 signal was calculated in a 200 bp window centered on a dominant peak. See also Figure S4 and Table S4.

240

241

242 Bdf1 interactions with chromatin were previously shown to be modulated by Esa1 (Durant and Pugh,  
 243 2007; Koerber et al., 2009). We used ChEC-seq to measure changes in Bdf1 occupancy following Esa1  
 244 depletion. In parallel, we measured changes in H4K12ac level using ChIP-seq. After 1 hour of IAA  
 245 treatment, the H4K12ac chromatin signal decreased dramatically, but Bdf1 was still bound at substantial

246 levels, especially at promoters (**Figures 3D and S4D and Table S4**). Nevertheless, the quantified  
247 changes in Bdf1 promoter signal and transcription following Esa1 depletion are correlated, suggesting  
248 that the effect of Esa1 on transcription is largely mediated by Bdf1 (**Figure 3E**). Consistent with our  
249 results, Brd4 was also detected at human promoters following bromodomain inhibition or mutation which  
250 explains why BET degradation outperforms BET inhibition in preclinical cancer models (Bauer et al.,  
251 2021; Kanno et al., 2014; Winter et al., 2017).

252

### 253 **Bdf1/2 play a role in both TFIID and Mediator recruitment**

254 Human BET factors are involved in recruitment of Mediator (Bhagwat et al., 2016) and Bdf1/2 were  
255 proposed to assist in recruitment of TFIID to yeast promoters (Matangkasombut et al., 2000). We used  
256 ChEC-seq to measure changes in chromatin occupancy of selected subunits of TFIID (Taf1, Taf11),  
257 Mediator (Med8, Med17) and SAGA (Spt3) after Bdf depletion. We first defined promoters bound by  
258 each factor and restricted the downstream analysis only to these locations. Different factors mapped in  
259 this study had characteristic distributions between the two classes of yeast promoters. Bdf1/2 are  
260 enriched at TFIID-dependent promoters, TFIID does not exhibit preference against either class, and  
261 SAGA and Mediator are enriched at CR promoters (**Figure S5A and Table S4**). We observed modest  
262 (~1.7-fold) decreases in TFIID and Mediator occupancy at all bound promoters following Bdf depletion  
263 (**Figures 4A, 4B, S5B and S5C and Table S4**). In contrast, SAGA binding was relatively insensitive to  
264 Bdf depletion with only small decreases observed, mostly at CR promoters. Importantly, changes  
265 measured for different subunits of TFIID or Mediator correlate (**Figures S5D and S5E and Table S4**).  
266 Using the ChIP-seq assay, similar results were observed for Bdf-dependent Taf1 binding (**Figure S5C**  
267 **and S5F and Table S4**).

268

269 We next tested whether the decreases in TFIID and Mediator recruitment were due to cooperative  
270 interactions between these two factors (Grünberg et al., 2016; Knoll et al., 2018) or via a more direct  
271 role of Bdfs in modulating TFIID and Mediator binding. We used ChEC-seq to measure changes in Taf1  
272 and Med8 promoter signals after depleting Med14 and Taf13, respectively. We confirmed modest  
273 binding cooperativity between both factors but the decreases in TFIID and Mediator binding were  
274 significantly stronger after depleting Bdfs (**Compare Figure 4A,B with 4C,D; Table S4**). This indicates  
275 a role of Bdfs in both TFIID and Mediator binding beyond the cooperative interactions of these two  
276 factors. Altogether, our results illustrate that Bdfs have independent contributions to the recruitment of  
277 TFIID and Mediator although, in the absence of Bdfs, both factors are still recruited to promoters at  
278 substantial levels. This suggests that the strong transcription defects upon Bdf depletion are not solely  
279 mediated by defects in TFIID and Mediator binding.

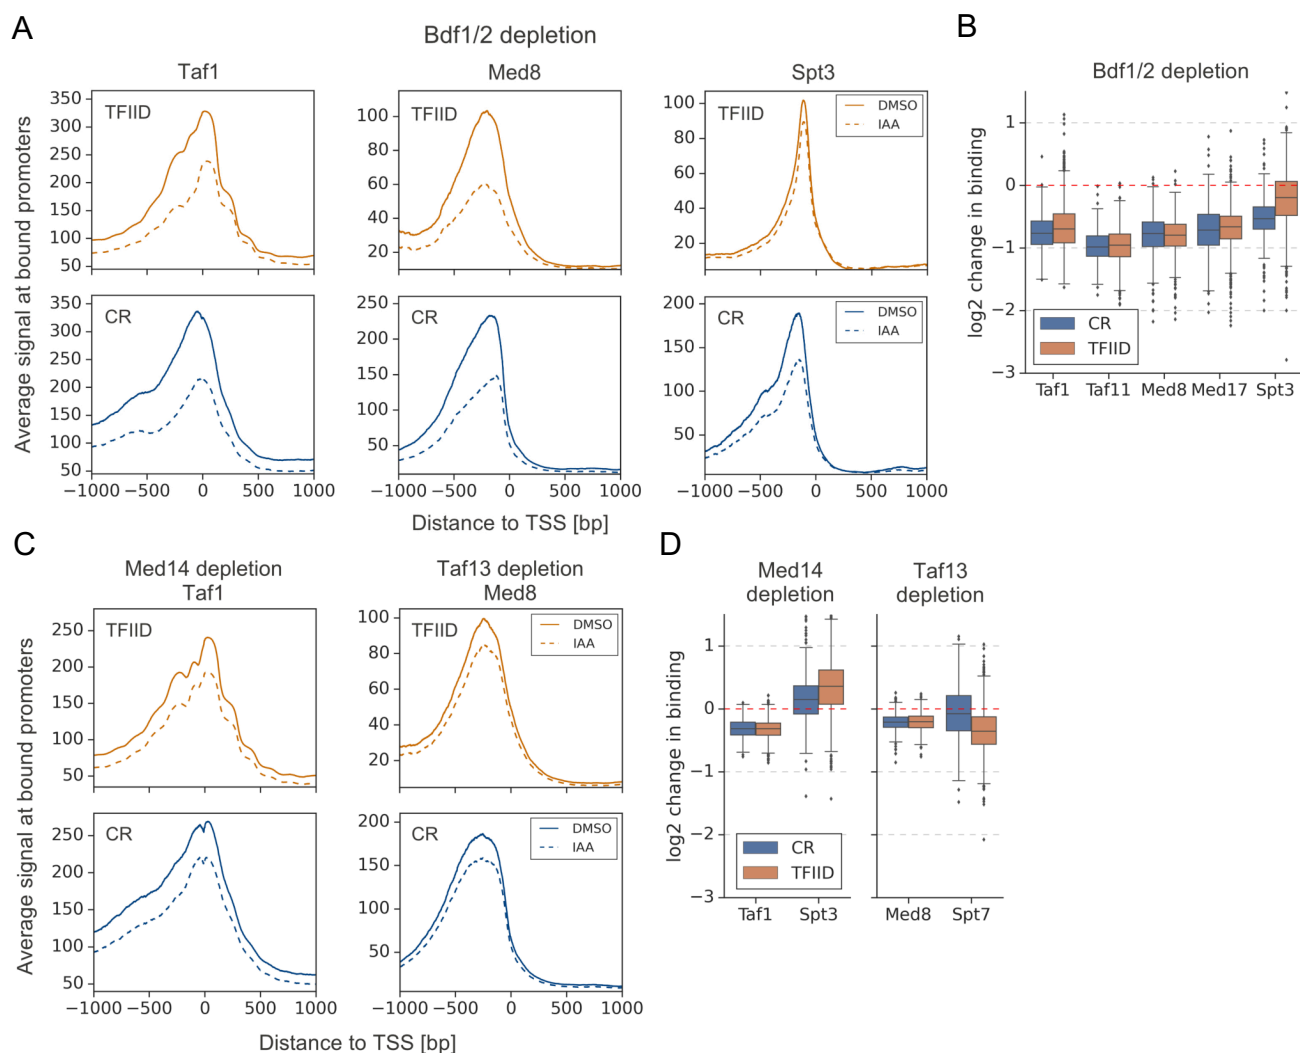

**Figure 4. Bdf1/2 participate in recruitment of TFIID and Mediator to chromatin.** (A) Average plots comparing Taf1, Med8 and Spt3 ChEC-seq signals before (DMSO, solid line) and after (IAA, dashed line) Bdf1/2 depletion at promoters bound by each factor and classified into TFIID-dependent and CR categories (2879, 890 and 2526 promoters, respectively). Mean values from replicate experiments are plotted. (B) Boxplot showing log<sub>2</sub> change in promoter occupancy of indicated factors after Bdf1/2 depletion. Signals were calculated in a 200 bp window centered on a dominant peak. (C) Average plots comparing Taf1 and Med8 ChEC-seq signals before (DMSO, solid line) and after (IAA, dashed line) Med14 or Taf13 depletion, respectively. Same set of promoters as in Figure 4A was used for this analysis. (D) Boxplot showing log<sub>2</sub> change in promoter occupancy of indicated factors after Med14 or Taf13 depletion. Signals were calculated in a 200 bp window centered on a dominant peak. List of Spt3 bound promoters was used to calculate Spt7 occupancy. See also Figure S5 and Table S4.

280

281

## 282 PIC assembly, especially at TFIID-dependent genes, is strongly dependent on Bdf1/2

283 Since the strong decrease in transcription of TFIID-dependent genes could not be explained solely by  
 284 decreases in TFIID or Mediator binding, we probed for defects in PIC assembly, using ChIP-seq to  
 285 quantitate promoter binding of the basal factor TFIIB. Depletion of either Bdfs or Taf13 caused a global

286 loss of TFIIB, most pronounced at TFIID-dependent promoters (**Figures 5A and S6A and Table 4**).

287 Comparing the defects in TFIIB binding due to Bdf depletion vs TFIID depletion, we found that Bdf

288 depletion caused a significantly larger loss of TFIIB at TFIID-dependent promoters than does TFIID

289 depletion (**Figure 5B and Table S4**). Conversely, at CR genes, we found that TFIID depletion caused

290 a greater loss in TFIIB signal compared with Bdf depletion. These results are consistent with the above

291 RNA-seq experiments. However, comparison of transcriptional and TFIIB binding defects caused by

292 Bdf depletion shows that Bdfs have a broader role in transcription than solely regulating PIC assembly.

293 This larger role of Bdfs is especially apparent for the most Bdf-dependent genes where transcription

294 defects significantly exceed the defect in TFIIB binding (**Figure 5C**). Combined, our results suggest an

295 additional role of Bdfs in transcription that extend beyond organizing a platform for recruitment of PIC

296 components.

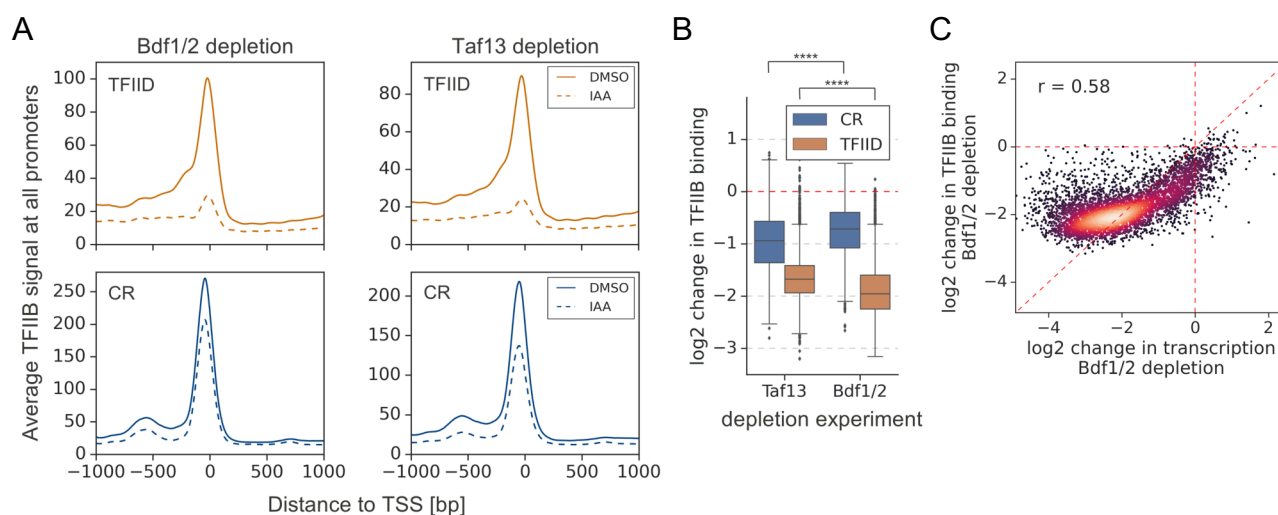

**Figure 5. Depletion of Bdf1/2 compromises TFIIB recruitment to promoters.** (A) Average plots comparing TFIIB ChIP-seq signals before (DMSO, solid line) and after (IAA, dashed line) Bdf1/2 or Taf13 degradation at 4900 promoters classified into TFIID-dependent and CR categories. Mean values from replicate experiments are plotted. (B) Boxplot showing log<sub>2</sub> change in promoter occupancy of TFIIB after Taf13 or Bdf1/2 degradation. Signals were calculated in a -200 to 100 bp window relative to TSS. Results of the Welch's t-test are shown. (C) Scatter plot comparing log<sub>2</sub> change in transcription and log<sub>2</sub> change in TFIIB occupancy after Bdf1/2 degradation at 4883 promoters/genes analyzed in RNA-seq experiments. Spearman correlation coefficient ( $r$ ) is shown. See also Figure S6 and Table S4.

297

298

### 299 **Bdf1/2 promote productive elongation at a subset of genes**

300 At many metazoan promoters, Pol II pauses after transcribing ~20-100 nucleotides and release of

301 paused Pol II, mediated in part by the C-terminal repeat domain (CTD) Ser2 phosphorylation, is a critical

302 step in gene regulation (Core and Adelman, 2019). Interestingly, Brd4 was shown to be involved in Ser2

303 phosphorylation (Muhar et al., 2018; Winter et al., 2017). While metazoan-like Pol II pausing does not

304 occur at yeast promoters, Pol II stalling and shifts in Pol II distribution under specific conditions have  
305 been observed in both budding and fission yeast (Badjatia et al., 2021; Shetty et al., 2017).

306

307 We tested whether Bdfs, like the mammalian BET factors, play a role in Pol II elongation. Elongating  
308 Pol II was quantitated using ChIP-seq for Rpb1 before and after depleting Bdfs and, as a comparison,  
309 Taf1. We first calculated the change in Pol II occupancy along the whole transcribed region. We found  
310 that the change in transcription following Bdf depletion is not proportional to the loss of Pol II signal,  
311 even though the two results show a good correlation (**Figure 6A and Table S5**). As we observed for  
312 TFIIIB, the decrease in Pol2 signal at the most Bdf-dependent genes is less severe than the loss of  
313 transcription. Importantly, we did not detect such difference after depleting Taf1 (**Figure S7A and Table**  
314 **S5**). Next, we divided genes into quintiles, based on Bdf dependence, and plotted the change in Pol II  
315 occupancy up to 1 kb downstream from the TSS (**Figure 6**). With the exception of the first quintile (the  
316 least Bdf-dependent genes), Bdf depletion caused a similar loss of Pol II at TSSs of all genes.  
317 Interestingly, the Pol II loss increased further downstream of TSS at the most Bdf-dependent genes  
318 until stabilizing at ~400 bp downstream of TSS. Conversely, at the least Bdf-dependent genes, the Pol  
319 II signal partially recovered in the gene body relative to the loss at TSS. We calculated the Pol II  
320 travelling ratio (TR) defined as the ratio of Rpb1 signal at 5' versus the 3' end of transcribed region (Rahl  
321 et al., 2010). We observed a decrease of TR at the least Bdf-dependent genes and an increase of TR  
322 at the most dependent genes following Bdf depletion (**Figure 6C and Table S5**). Analysis of individual  
323 genes revealed shifts in Pol II distribution towards 3' or 5' ends of genes, respectively (**Figure S7B**).  
324 We did not detect similar changes in Pol II distribution after depleting Taf1 (**Figures S7C and S7D and**  
325 **Table S5**). Importantly, the change in TR after depleting Bdfs correlates with the change in transcription  
326 at individual genes (**Figure 6D**). Combined with our earlier findings, this suggests that the most Bdf-  
327 dependent genes experience transcription defects both at the initiation and elongation stages upon Bdf  
328 depletion. This explains the disproportionately large decrease in the amount of nascent RNA. On the  
329 other hand, more efficient elongation at the least Bdf-dependent genes seems to partially nullify the  
330 initiation defects leading to little total change in transcription upon Bdf depletion (**Figure 1C**).

331

332 To further explore elongation defects, we performed ChIP-seq with antibodies specific to  
333 phosphorylated CTD residues Ser5P and Ser2P. Sequential deposition of these marks coordinates the  
334 assembly of multiple factors during transcription and they are involved in successful promoter escape  
335 and elongation, respectively (Harlen and Churchman, 2017). We measured total Ser5P and Ser2P  
336 signals along transcribed regions, normalized them by corresponding Rpb1 signals, and calculated the  
337 change in CTD phosphorylation status following Bdf depletion (**Figure 6E and Table S5**). In agreement  
338 with the above findings that the most Bdf-dependent genes have a defect in elongation, Pol II becomes

339 hypophosphorylated on Ser2 and, to a lesser extent, on Ser5 after depleting Bdfs. Conversely, at the  
 340 least Bdf-dependent genes, Pol II becomes weakly hyperphosphorylated, in agreement with the  
 341 suggestion that at this gene set elongation becomes more efficient. Importantly, we did not observe  
 342 similar changes in Pol II phosphorylation after Taf1 depletion, which validates that Bdfs have a TFIID-  
 343 independent role in regulating transcriptional elongation (**Figure S7E and Table S5**).

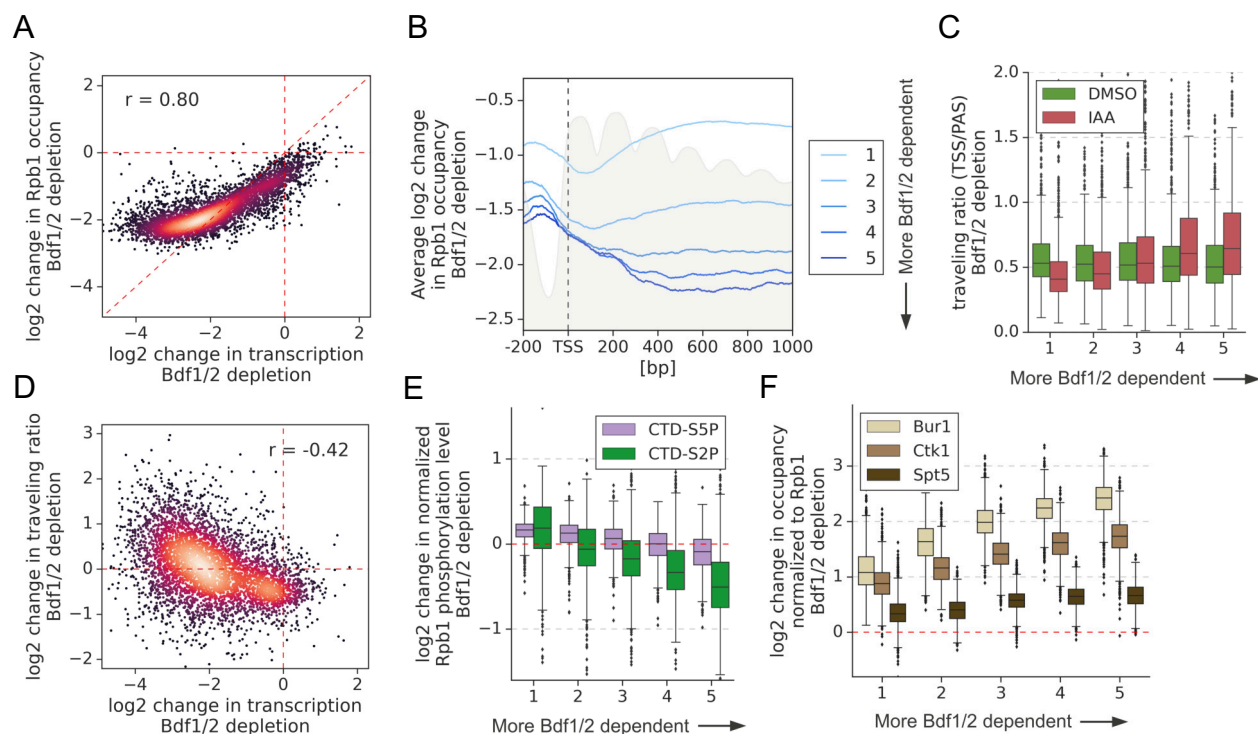

**Figure 6. Bdf1/2 are involved in transcriptional elongation.** (A) Scatter plot comparing log<sub>2</sub> change in transcription and occupancy of the largest Pol II subunit Rpb1 after Bdf1/2 degradation. Rpb1 occupancy was calculated along the whole transcribed region for 4615 genes longer than 300 bp, and with annotated TSS and PAS locations (Park et al., 2014). Spearman correlation coefficient (*r*) is shown. Mean values from replicate experiments are plotted. (B) Average plot showing log<sub>2</sub> change in Rpb1 occupancy from 200 bp upstream to 1000 bp downstream of TSS after depleting Bdf1/2. Data in this and following panels are divided into five groups based on gene dependence on Bdf1/2 as measured by 4-thioU RNA-seq for 3438 genes longer than 1 kb and with annotated TSS and PAS locations (Park et al., 2014). Published MNase-seq dataset is shown as a grey area plot (Oberbeckmann et al., 2019). (C) Boxplot comparing Pol II traveling ratio (TR) in DMSO or IAA treated samples in the Bdf1/2 degenon experiment. TR represents a ratio of Rpb1 occupancy calculated in 100 bp windows at the beginning and end of a transcribed region. The same set of 4615 genes as in Figure 6A was used. (D) Scatter plot comparing log<sub>2</sub> change in transcription and log<sub>2</sub> change in Pol II traveling ratio after depleting Bdf1/2. Spearman correlation coefficient (*r*) is shown. (E) Boxplot comparing log<sub>2</sub> change in Rpb1 CTD phosphorylation status at Ser2 and Ser5 residues after depleting Bdf1/2. Data were calculated along the whole transcribed region for the same set of 4615 genes as in Figure 6A and signals were normalized to the total Rpb1 signal. (F) Boxplot comparing log<sub>2</sub> change in Bur1, Ctk1 and Spt5 occupancy after depleting Bdf1/2. Data for DMSO and IAA treated samples were calculated along the whole transcribed region for the same set of 4615 genes as in Figure 6A and signals were normalized to the total Rpb1 signal. See also Figure S7 and Table S5.

344

345 Bur1 and Ctk1, homologues of metazoan Cdk9 and Cdk12/13, are responsible for CTD Ser2P marks  
346 in yeast. We used ChIP-seq to measure Bur1 and Ctk1 levels along the transcribed regions, normalized  
347 them by corresponding Rpb1 signals, and calculated the change in their relative occupancy following  
348 Bdf depletion (**Figure 6F and Table S5**). We observed ~2-fold increases in occupancy of both kinases  
349 relative to Rpb1 at the least Bdf-dependent genes, a result that agrees with observed CTD  
350 hyperphosphorylation. Interestingly, at the rest of genes, the relative occupancy of both kinases further  
351 increased, correlating with gene dependence on Bdfs. As a comparison, we also investigated defects  
352 in the recruitment of Spt5, an essential elongation factor. We observed a uniform, small (~1.4-fold)  
353 increase in Spt5 occupancy, normalized to Rpb1, at all tested genes (**Figure 6F and Table S5**). These  
354 results show that changes in the recruitment of Spt5 and the CTD kinases cannot account for the  
355 function of the Bdfs in transcription elongation.

356

## 357 **Discussion**

358 After development of specific inhibitors targeting BET bromodomains (BDs), BET factors, especially  
359 Brd4, emerged as key regulators of transcription and as promising targets in the therapy of cancer and  
360 immunoinflammatory diseases (Fujisawa and Filippakopoulos, 2017; Wang et al., 2021). In this work,  
361 we investigated the roles of yeast BET family members Bdf1 and Bdf2. We explored transcription  
362 dependence on Bdf1/2, their genome-wide binding patterns and, their interplay with key components of  
363 the transcriptional machinery. We found that Bdf functions go beyond solely regulating TFIID, as  
364 expression from most genes is more sensitive to Bdf vs TFIID depletion. Our results establish the Bdfs  
365 as critical for normal expression of most yeast genes, with functions both during transcription initiation  
366 and elongation. Our work reveals that the roles of yeast BET factors are surprisingly similar to their  
367 human equivalents and suggests conserved mechanisms of BET function across eukaryotes.

368

369 Bdf1 was proposed to act as part of yeast TFIID, substituting for the metazoan Taf1 BDs  
370 (Matangkasombut et al., 2000). This function might be especially important in yeast, as H4 acetylation  
371 is enriched at most promoters and yeast promoters lack known DNA sequence motifs that are bound  
372 by TFIID. However, we found that that the organization and amino acid sequence of Bdf1 is more similar  
373 to human BET factors than to the human Taf1 (hTaf1) bromodomains. Our results showed that Bdfs  
374 regulate a similar set of genes as TFIID, but that there are important differences. Transcription from  
375 most genes defined earlier as coactivator-redundant (CR) is largely insensitive to Bdf depletion, while  
376 a large subset of TFIID-dependent genes is significantly more affected by Bdf vs TFIID depletion.

377



378 Genome-wide mapping revealed that Bdf1/2 are found together with TFIID at many promoters and that  
379 they contribute to TFIID recruitment. However, a substantial fraction of TFIID is still bound to promoters  
380 in the absence of Bdfs, in agreement with the sub-stoichiometric association between Bdf1 and TFIID  
381 (Sanders et al., 2002). Interestingly, human BET proteins were shown to associate with TFIID in a  
382 proteomic screen and both Brd4 and hTaf1 were proposed to have synergistic effects on gene  
383 expression and cell growth (Lambert et al., 2019; Sdelci et al., 2016). Finally, hTaf1 BDs have the same  
384 substrate specificity as BET BDs and both Brd4 and TFIID are bound to the majority of active promoters  
385 in human cells (Bhagwat et al., 2016; Lauberth et al., 2013; Slaughter et al., 2021). Based on our  
386 findings and the presented evidence from human cells, we propose that cooperation between BET  
387 factors and TFIID is a conserved feature of eukaryotic gene regulation. The gain of bromodomains by  
388 metazoan TFIID may result from the increased complexity of gene expression programs and allow for  
389 BET-independent TFIID interactions with acetylated histone H4.

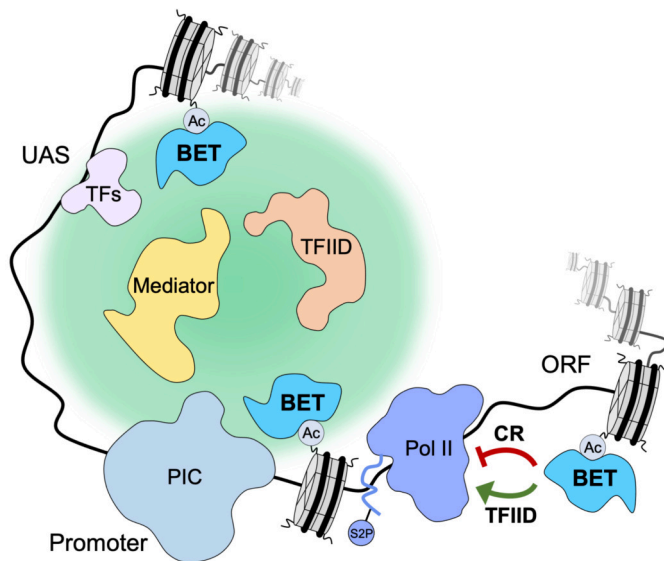

**Figure 7. Yeast BET proteins regulate transcription initiation and elongation.** Yeast BET proteins bind to regions of the genome highly acetylated at histone H4. Together with sequence-specific transcription factors (TFs) they provide a nucleation center for dynamic recruitment of TFIID and Mediator to the promoter-proximal nuclear territory. In turn, TFIID and Mediator create a platform which facilitates PIC assembly and stimulates transcription initiation. Yeast BET proteins also affect processive elongation serving as negative regulatory factors at CR genes and positive regulatory factors at TFIID-dependent genes.

390

391

392 Brd4 interacts with Mediator and participates in Mediator recruitment to enhancers and promoters  
393 (Bhagwat et al., 2016; Wu et al., 2003). Our experiments revealed that Bdfs are important for normal  
394 levels of Mediator occupancy. A direct role of Bdfs in Mediator targeting to chromatin was surprising  
395 and we considered the possibility that other factors are involved in that process. Mediator was proposed  
396 to be recruited cooperatively with TFIID (Grünberg et al., 2016; Johnson et al., 2002; Knoll et al., 2018).

397 We confirmed this modest cooperativity, but we found that the contribution of Bdfs to Mediator  
398 recruitment surpasses that of TFIID. There is strong evidence that TFIID and Mediator act as molecular  
399 scaffolds to organize the recruitment of other components of transcriptional machinery (Allen and  
400 Taatjes, 2015; Patel et al., 2020). Human Mediator and Brd4 were also found to participate in the  
401 formation of dynamic nuclear condensates at the sites of active transcription (Han et al., 2020; Sabari  
402 et al., 2018). Finally, a recent study suggested cooperation of yeast TFIID and Mediator in restricting  
403 the diffusion of PIC components to shared subnuclear territories in order to facilitate gene transcription  
404 (Nguyen et al., 2020). We propose that chromatin tethered yeast BET factors serve as a nucleation  
405 center for dynamic recruitment of Mediator and TFIID, that in turn create a platform for efficient PIC  
406 assembly. This role of Bdf1/2 seems widespread and likely complementary to the action of sequence-  
407 specific transcription factors (TFs) (**Figure 7**).

408  
409 At the least Bdf-dependent genes, we observed a modest decrease in TFIID, Mediator and TFIIB  
410 recruitment after Bdf depletion, which did not translate into appreciable defects in mRNA synthesis.  
411 Conversely, at the most Bdf-dependent genes, the loss of transcription exceeded the loss of Mediator,  
412 TFIID, TFIIB and Pol II recruitment. The unexpected role of the yeast BET factors in transcription  
413 elongation provided an explanation for these seemingly conflicting results (**Figure 7**). At CR genes and,  
414 at a small subset of TFIID-dependent genes, Bdf depletion results in a 3' shift in Pol II distribution and  
415 increased CTD Ser2 phosphorylation. This suggests more efficient elongation of these genes in the  
416 absence of Bdfs. In contrast, Bdf depletion at many TFIID-dependent genes causes Pol II accumulation  
417 at 5' gene ends and a loss of CTD Ser2 phosphorylation. This change in Pol II profile is highly similar  
418 to the defects in pause release caused by BET depletion in human cells (Muhar et al., 2018; Winter et  
419 al., 2017). At these yeast genes, the combined initiation and elongation defects resulting from Bdf  
420 depletion lead to a large decrease in mRNA synthesis.

421  
422 CTD Ser2 residues in yeast are phosphorylated by kinases Bur1 and Ctk1, homologues of metazoan  
423 Cdk9 and Cdk12/13, respectively. Ctk1 is the dominant CTD kinase in yeast while in metazoans  
424 Cdk12/13 seem to be less important, although the interplay between Cdk9 and Cdk12/13 is poorly  
425 understood (Harlen and Churchman, 2017). At Bdf-independent genes, depletion of Bdfs results in a  
426 modest increase of Bur1 and Ctk1 occupancy normalized to Rpb1 level, and this agrees with a gain of  
427 CTD Ser2P marks at these genes. Surprisingly, at Bdf-dependent genes, occupancy of both kinases  
428 relative to Rpb1 level increased significantly after Bdf depletion, and in apparent conflict with observed  
429 defects in CTD Ser2 phosphorylation. Interestingly, depletion of Brd4 or all BET factors in human cells  
430 was shown to result in a small increase in Cdk9 and Cyclin T1 chromatin occupancy, even though it  
431 causes a decrease in CTD Ser2P marks and a defect in pause release (Muhar et al., 2018; Winter et

432 al., 2017). It is not known if Brd4 affects Cdk12/13 recruitment. There are alternative models explaining  
433 the role of Brd4 in transcription elongation. Brd4 was shown to release Hexim1-mediated inhibition of  
434 Cdk9 *in vitro* thus acting as a positive regulator of P-TEFb (Itzen et al., 2014). It was also proposed that  
435 Brd4 can act as a histone chaperone and facilitate Pol II elongation independently of its interaction with  
436 P-TEFb (Kanno et al., 2014). Finally, it is possible that CTD hypophosphorylation at BET-dependent  
437 genes may result from defects in recruitment and/or reduction in function of other elongation factors.  
438 Since the role(s) of the BET factors in elongation are unresolved in both systems, it will be of great  
439 interest to determine whether the yeast and metazoan factors use similar mechanisms to regulate  
440 elongation.

441

442 Redundancy between three (Brd2, Brd3, Brd4) of the four mammalian BET factors was proposed based  
443 on their ubiquitous expression in most tissues, similar binding patterns and, because they are all  
444 essential for embryonic development (Gyuris et al., 2009; Khoueiry et al., 2019; Uhlén et al., 2015). The  
445 extent of this redundancy is poorly understood because only a few context-specific examples of shared  
446 functions of BET factors have been reported (Gilan et al., 2020; Rahman et al., 2011; Stonestrom et al.,  
447 2015). In most studies the roles of BET factors in transcriptional regulation were attributed to Brd4 alone  
448 (Muhar et al., 2018; Zheng et al., 2021; Zuber et al., 2011). Our data indicate that yeast BET proteins  
449 are functionally redundant under normal growth conditions, with Bdf1 being the dominant factor. The  
450 changes in transcription following depletion of Bdf1 or Bdf1/2 are highly correlated, while depletion of  
451 Bdf2 does not have significant consequences for the cell. In addition, Bdf1 and Bdf2 have nearly  
452 identical genome-wide binding patterns and Bdf2 redistributes from CR to TFIID-dependent genes upon  
453 Bdf1 depletion. Interestingly, it was reported that Bdf2 overexpression can suppress temperature- and  
454 salt-sensitive phenotypes in *bdf1* deletion strain, but at the same time Bdf1 was found to be a negative  
455 regulator of Bdf2 expression (Fu et al., 2013; Matangkasombut et al., 2000). This latter finding is also  
456 supported by our RNA-seq results where we observed ~2-fold upregulation of *BDF2* transcription  
457 following Bdf1 depletion. Importantly, a similar interplay between human BET factors in regulating  
458 expression of other family members was recently proposed (Lambert et al., 2019). It remains to be  
459 investigated if and to what extent Brd2 and/or Brd3 can replace Brd4 in supporting transcription in  
460 human cells.

461

462 Recent years have brought remarkable discoveries highlighting the essential nature of mammalian BET  
463 factors. Still, many aspects of their biology remain poorly understood, including details of the relationship  
464 with other components of the transcriptional machinery at enhancers and promoters and the extent of  
465 redundancies. We uncovered striking similarities between yeast and mammalian BET family members.  
466 Many of the most BET sensitive genes in both systems lack a TATA element in their promoters and

467 control highly similar cellular processes. BET proteins are also universally involved in the recruitment  
468 of Mediator to chromatin and modulation of transcriptional elongation. Considering the relative simplicity  
469 compared to metazoans, the yeast model system offers unique opportunities for a detailed investigation  
470 of different aspects of BET biology and this work provides a foundation for these future studies.

471

## 472 **Materials and Methods**

### 473 **Yeast cell growth**

474 All *S. cerevisiae* and *S. pombe* strains used in this study are listed in **Table S1**. *S. cerevisiae* strains  
475 were grown in YPD medium (1% yeast extract, 2% peptone, 2% glucose, 20 µg/ml adenine sulfate) at  
476 30°C with shaking. *S. pombe* strains were grown in YE medium (0.5% yeast extract, 3% glucose) at  
477 30°C with shaking. In experiments involving degron depletion of target proteins, *S. cerevisiae* strains  
478 were treated with 500 µM indole-3-acetic acid (IAA) dissolved in DMSO or with DMSO alone for 30 min  
479 (or 60 min for Esa1-degron strains) to induce protein degradation followed by protocol-specific steps.  
480 In RNA-seq experiments, *S. cerevisiae* and *S. pombe* strains were grown to A600 ~ 1.0. In ChEC-seq  
481 experiments *S. cerevisiae* strains were grown to A600 ~ 0.6. In ChIP-seq experiments *S. cerevisiae*  
482 and *S. pombe* strains were grown to A600 ~ 0.8. The number of biological replicates collected in each  
483 experiment is listed in **Table S6**.

484

### 485 **Strain construction**

486 *S. cerevisiae* strains (**Table S1**) were constructed using standard methods. Proteins were  
487 chromosomally tagged by yeast transformation and homologous recombination of PCR-amplified DNA.  
488 Plasmid pFA6a-3V5-IAA7-KanMX6 (Chan et al., 2018), or a derivative with the *KanMX* marker replaced  
489 by *URA3* (pSH1855), were used as a template for generating the IAA7 degron tags. This C-terminal tag  
490 contains three copies of the V5 epitope tag followed by the IAA7 degron. For ChEC-seq experiments,  
491 proteins were tagged with 3xFLAG-MNase::TRP1 using pGZ110 (Zentner et al., 2015). Plasmids p2L-  
492 3Flag-NAT and pFA6a-13Myc-Hyg (a gift from Toshio Tsukiyama, Fred Hutch) were used as templates  
493 to generate PCR fragments for tagging proteins with 3xFlag and 13xMyc epitope tags. A strain  
494 expressing free MNase under control of the native *BDF2* promoter was constructed the following way.  
495 First, the *MED8* promoter in pSG79 (Grünberg et al., 2016) was exchanged with the *BDF2* promoter  
496 (containing 500 bp upstream DNA from the *BDF2* start codon). A XhoI/SacI fragment containing the  
497 *pBDF2*-MNase fusion DNA was inserted to the yeast integrating vector pRS303. The resulting pRD15  
498 plasmid was linearized with BstEII and integrated into strain BY4705. *BDF2* deletion strain was  
499 constructed by replacing the *BDF2* gene with the *HPH* marker amplified from plasmid pAG32 (Goldstein  
500 and McCusker, 1999). *ESA1*-containing vectors were constructed by inserting a XhoI/SacI fragment

501 containing the *ESA1* gene with its native promoter and terminator into vectors pRS316 (pRD5) and  
502 pRS315 (pRD21). A plasmid shuffle strain was constructed containing WT *ESA1* on plasmid pRD5 and  
503 a chromosomal deletion of *ESA1* in strain SHY1036. pRD21 was modified by replacing nucleotides 301  
504 – 354 in the *ESA1* ORF with the 3xV5-IAA7 fragment to create the Esa1-degron. Plasmid shuffling was  
505 used to replace pRD5 with pRD21 by counter selection on 5-FOA plates.

506

#### 507 **Western blot analysis**

508 1 ml cell culture was collected and pelleted from strains after treatment with IAA or DMSO, washed with  
509 500  $\mu$ l water, then resuspended in 100  $\mu$ l yeast whole cell extract buffer (60 mM Tris, 6.8, 10% glycerol,  
510 2% SDS, 5% 2-mercaptoethanol, 0.0025% bromophenol blue). After heating for 5 min at 95°C, samples  
511 were centrifuged for 5 min at 21K x g and analyzed by SDS-PAGE and Western blot where protein  
512 signals were visualized by using the Odyssey CLx scanner and quantified using Odyssey Image Studio  
513 software (Li-Cor) by generating a standard curve using a titration from WT extract. Each protein  
514 analyzed was normalized to the amount of the TFIIIF subunit Tfg2.

515

#### 516 **Spot assay for yeast growth**

517 *S. cerevisiae* strains were streaked from glycerol stocks on YPD plates and incubated for 3 days at  
518 30°C. Single colonies from freshly grown plates were used to start overnight cultures for the spot assay.  
519 After reaching saturation, cultures were diluted to A600 = 1.0 and 10x serial dilutions were prepared.  
520 10  $\mu$ l of appropriate dilution was spotted on YPD plates and the plates were incubated for 2-3 days at  
521 30°C to compare growth rates.

522

#### 523 **Isolation of newly synthesized RNA**

524 All steps were done essentially as described with minor modifications (Donczew et al., 2020). Two  
525 (Bdf1, Bdf2,  $\Delta bdf2$ , Bdf1 $\Delta bdf2$ , H2A.Z) or three (Bdf1/2, Toa1, Ssl2) replicate samples were collected  
526 for each experiment. 10 ml *S. cerevisiae* or 20 ml *S. pombe* (strain SHY1058) cultures were labeled  
527 with 5 mM 4-thiouracil (4-thioU) (Sigma-Aldrich #440736) for 4 min, the cells were pelleted at 3000 x g  
528 for 3 min, flash-frozen in liquid N<sub>2</sub>, and then stored at -80°C for further use. *S. cerevisiae* and *S. pombe*  
529 cells were mixed in an 8:1 ratio and total RNA was extracted using reagents from RiboPure yeast kit  
530 (Thermo Fisher Scientific #AM1926) using the following volumes: 480  $\mu$ l lysis buffer, 48  $\mu$ l 10% SDS,  
531 480  $\mu$ l phenol/CHCl<sub>3</sub>/isoamyl alcohol (25:24:1) per *S. cerevisiae* pellet + 50  $\mu$ l *S. pombe* cell solution  
532 (from a single *S. pombe* pellet resuspended in 850  $\mu$ l lysis buffer). Cells were lysed using 1.25 ml  
533 zirconia/silica beads (RPI #9834) in a Mini Beadbeater-96 (BioSpec Products) for 5 min. Lysates were  
534 spun for 5 min at 16k x g, then the following volumes were combined in a 5 ml tube: 400  $\mu$ l supernatant,

535 1400 µl binding buffer, 940 µl 100% ethanol. Samples were processed through Ambion filter cartridges  
536 until all sample was loaded, then washed with 700 µl Wash Solution 1, and twice with 500 µl Wash  
537 Solution 2/3. After a final spin to remove residual ethanol, RNA was eluted with 25 µl 95°C preheated  
538 Elution Solution. The elution step was repeated, and eluates combined. RNA was then treated with  
539 DNaseI using 5 µl DNaseI buffer and 4 µl DNaseI for 30 min at 37°C, then treated with Inactivation  
540 Reagent for 5 min at RT. Total RNA samples were stored at -20°C for up to 2 months or at -80°C for  
541 longer periods.

542  
543 RNA was biotinylated using 40 µl (~40 µg) total RNA and 4 µg MTSEA biotin-XX (Biotium #90066-1) in  
544 the following reaction: 40 µl total 4-thioU-labeled RNA, 20 mM HEPES, 1 mM EDTA, 4 µg MTSEA  
545 biotin-XX (80 µl 50 µg/ml diluted stock) in a 400 µl final volume. Biotinylation reactions occurred for 30  
546 min at RT with rotation and under foil. Unreacted MTS-biotin was removed by phenol/CHCl<sub>3</sub>/isoamyl  
547 alcohol (25:24:1) extraction. RNA was precipitated with isopropanol and resuspended in 100 µl  
548 nuclease-free H<sub>2</sub>O. Biotinylated RNA was purified using 80 µl MyOne Streptavidin C1 Dynabeads  
549 (Thermo Fisher Scientific #65002) + 100 µl biotinylated RNA for 15 min at RT with rotation and under  
550 foil. Prior to use, MyOne Streptavidin beads were washed in a single batch with 3 × 3 ml H<sub>2</sub>O, 3 × 3 ml  
551 High Salt Wash Buffer (100 mM Tris, 7.4, 10 mM EDTA, 1 M NaCl, 0.05% Tween-20), blocked in 4 ml  
552 High Salt Wash Buffer containing 40 ng/µl glycogen (Millipore Sigma #10901393001) for 1 hr at RT,  
553 then resuspended to the original volume in High Salt Wash Buffer. After incubation with biotinylated  
554 RNA, the beads were washed 3 × 0.8 ml High Salt Wash Buffer, then eluted into 25 µl streptavidin  
555 elution buffer (100 mM DTT, 20 mM HEPES, 7.4, 1 mM EDTA, 100 mM NaCl, 0.05% Tween-20) at RT  
556 with shaking, then the elution step was repeated, and eluates were combined for a total of 50 µl.  
557 Samples were stored at -20°C until further processing.

558  
559 10% input (not biotinylated) RNA (4 µl) was diluted into 50 µl streptavidin elution buffer and processed  
560 the same as the biotinylated RNA samples to determine the extent of recovery. 50 µl of each input and  
561 biotinylated RNA was adjusted to 100 µl with nuclease-free water and purified on RNeasy columns  
562 (Qiagen #74104) using the modified protocol. To each 100 µl sample, 350 µl RLT lysis buffer (supplied  
563 by the Qiagen kit and supplemented with 10 µl 1% βME per 1 ml RLT) and 250 µl 100% ethanol was  
564 added, mixed well, and applied to columns. Columns were washed with 500 µl RPE wash buffer  
565 (supplied by the Qiagen kit and supplemented with 35 µl 1% βME per 500 µl RPE), followed by a final  
566 5 min spin at 21K xg. RNAs were eluted into 14 µl nuclease-free water and the RNA concentration was  
567 measured using Qubit HS RNA assay (Thermo Fisher Scientific #Q32852). Samples were stored at -  
568 20°C. One sample per batch prepared in a single day was tested for enrichment of labeled RNA by RT-

569 qPCR, probing both unlabeled and labeled RNA from at least three transcribed genes as previously  
570 described (Donczew et al., 2020). The purified 4-thioU labeled RNA contained 2–11% contamination of  
571 unlabeled RNA.

572

### 573 **Preparation of RNA-seq libraries for NGS**

574 Newly synthesized RNA isolated via 4-thioU labeling and purification was prepared for sequencing  
575 using the Ovation Universal RNA-seq Library Preparation Kit with *S. cerevisiae* AnyDeplete reagent  
576 (Tecan #0364-A01) according to the manufacturer's instructions and 50 ng input RNA. Libraries were  
577 sequenced on the Illumina HiSeq2500 platform using 25 bp paired-end reads at the Fred Hutchinson  
578 Genomics Shared Resources facility.

579

### 580 **ChEC-seq experiments**

581 ChEC-seq was performed as previously described (Donczew et al., 2021, 2020). In experiments  
582 involving Bdf1, Bdf2 or Bdf1/2 depletion six replicate samples were collected. In Esa1 depletion  
583 experiment two replicate samples were collected, as well as in experiments mapping SAGA subunits  
584 (Spt3, Spt7) following Med14 or Taf13 depletion. In all other experiments three replicate samples were  
585 collected. *S. cerevisiae* 50 ml cultures were pelleted at 2000 x g for 3 min. Cells were resuspended in  
586 1 ml of Buffer A (15 mM Tris, 7.5, 80 mM KCl, 0.1 mM EGTA, 0.2 mM spermine (Millipore Sigma  
587 #S3256), 0.3 mM spermidine (Millipore Sigma #85558), protease inhibitors (Millipore Sigma  
588 #04693159001)), transferred to a 1.5 ml tube and pelleted at 1500 x g for 30 sec. Cell were washed  
589 twice with 1 ml of Buffer A and finally resuspended in 570  $\mu$ l of Buffer A. 30  $\mu$ l 2% digitonin (Millipore  
590 Sigma #300410) was added to a final concentration of 0.1% and cells were permeabilized for 5 min at  
591 30°C with shaking (900 rpm). 0.2 mM CaCl<sub>2</sub> was added to the samples followed by incubation for  
592 another 5 min at 30°C. 100  $\mu$ l cell suspension was mixed with 100  $\mu$ l Stop Solution (400 mM NaCl, 20  
593 mM EDTA, 4 mM EGTA). Stop Solution was supplemented with 5  $\mu$ g MNase digested *D. melanogaster*  
594 chromatin. Samples were incubated with 0.4 mg/ml Proteinase K (Thermo Fisher Scientific #AM2548)  
595 for 30 min at 55°C and the DNA was purified by phenol/CHCl<sub>3</sub>/isoamyl alcohol (25:24:1) extraction and  
596 ethanol precipitation. Pellets were resuspended in 30  $\mu$ l 0.3 mg/ml RNase A (Thermo Fisher Scientific  
597 #EN0531) (10 mM Tris, 7.5, 1 mM EDTA, 0.3 mg/ml RNase A) and incubated for 15 min at 37°C. 60  $\mu$ l  
598 of Mag-Bind reagent (Omega Biotek #M1378-01) was added and the samples were incubated for 10  
599 min at RT. Supernatants were transferred to a new tube and the volume was adjusted to 200  $\mu$ l (10 mM  
600 Tris, 8.0, 100 mM NaCl). DNA was purified again by phenol/CHCl<sub>3</sub>/isoamyl alcohol (25:24:1) extraction  
601 and ethanol precipitation, and resuspended in 25  $\mu$ l 10 mM Tris, 8.0.

602

### 603 **ChIP-seq experiments**

604 ChIP-seq experiments were performed similarly as described (Donczew et al., 2020). Two replicate  
605 samples were collected for all experiments except for Bur1 ChIP-seq where three replicates were  
606 collected. 100 ml *S. cerevisiae* or *S. pombe* cultures were crosslinked with 1% formaldehyde (Sigma-  
607 Aldrich #252549) for 20 min in the above growth conditions, followed by another 5 min treatment with  
608 130 mM glycine. Cells were pelleted at 3000 x g for 5 min, washed with cold TBS buffer, pelleted at  
609 2000 x g for 3 min, flash-frozen in liquid N<sub>2</sub>, and then stored at -80°C for further use. Cell pellets were  
610 resuspended in 300 µl Breaking Buffer (100 mM Tris, 8.0, 20% glycerol, protease inhibitors (Millipore  
611 Sigma #04693159001)). Cells were lysed using 0.4 ml zirconia/silica beads (RPI #9834) in a Mini  
612 Beadbeater-96 (BioSpec Products) for 5 min. Lysates were spun at 21K x g for 2 min. Pellets were  
613 resuspended in 1 ml FA buffer (50 mM HEPES, 7.5, 150 mM NaCl, 1 mM EDTA, 1% Triton X-100, 0.1%  
614 sodium deoxycholate, protease inhibitors (Millipore Sigma #04693159001)) and transferred to 15 ml  
615 polystyrene tubes. In experiments with antibodies specific against phosphorylated Rpb1 CTD, Breaking  
616 Buffer and FA buffer were supplemented with phosphatase inhibitors (Thermo Fisher Scientific  
617 #A32957). Samples were sonicated in a cold Bioruptor sonicator bath (Diagenode #UCD-200) at a  
618 maximum output, cycling 30 sec on, 30 sec off, for a total of 45 min. Samples were spun twice in fresh  
619 tubes at 21K x g for 15 min. Prepared chromatin was flash-frozen in liquid N<sub>2</sub>, and then stored at -80°C  
620 for further use.

621  
622 20 µl of the chromatin sample was used to estimate DNA concentration. First, 20 µl Stop buffer (20 mM  
623 Tris, 8.0, 100 mM NaCl, 20 mM EDTA, 1% SDS) was added to samples followed by incubation at 70°C  
624 for 16-20 hrs. Samples were digested with 0.5 mg/ml RNase A (Thermo Fisher Scientific #EN0531) for  
625 30 min at 55°C and 1 mg/ml Proteinase K for 90 min at 55°C. Sample volume was brought to 200 µl  
626 and DNA was purified by two phenol/CHCl<sub>3</sub>/isoamyl alcohol (25:24:1) extractions and ethanol  
627 precipitation. DNA was resuspended in 20 µl 10 mM Tris, 8.0 and the concentration was measured  
628 using Qubit HS DNA assay (Thermo Fisher Scientific #Q32851).

629  
630 20 µl Protein G Dynabeads (Thermo Fisher Scientific #10003D) was used for a single  
631 immunoprecipitation. Beads were first washed three times with 500 µl PBST buffer (PBS buffer  
632 supplemented with 0.1% Tween 20) for 3 min with gentle rotation. Beads were resuspended in a final  
633 volume of 20 µl containing PBST buffer and 5 – 8 µl of appropriate antibody (Key Resources Table).  
634 The following antibody volumes were used: H4K12ac, FLAG-Tag, Myc-Tag – 5 µl; Rpb1 CTD (total or  
635 phosphorylated) – 8.5 µl. The bead suspension was incubated for 60 min with shaking (1400 rpm) at  
636 RT, washed with 500 µl PBST buffer and 500 µl FA buffer. Beads were finally resuspended in 25 µl FA



637 buffer. 1.5  $\mu$ g *S. cerevisiae* chromatin and 30 ng *S. pombe* chromatin (strain SHY1110) were combined  
638 and samples were brought to a final volume of 500  $\mu$ l. 25  $\mu$ l of each sample was mixed with 25  $\mu$ l Stop  
639 buffer and set aside (input sample). 25  $\mu$ l of beads was added to remaining 475  $\mu$ l of samples followed  
640 by incubation for 16-20 hrs at 4°C.

641  
642 The beads were washed for 3 min with gentle rotation with the following: 3 times with 500  $\mu$ l FA buffer,  
643 2 times with FA-HS buffer (50 mM HEPES, 7.5, 500 mM NaCl, 1 mM EDTA, 1% Triton X-100, 0.1%  
644 sodium deoxycholate), once with 500  $\mu$ l RIPA buffer (10 mM Tris, 8.0, 0.25 M LiCl, 0.5% NP-40, 1 mM  
645 EDTA, 0.5% sodium deoxycholate). DNA was eluted from beads with 25  $\mu$ l Stop buffer at 75°C for 10  
646 min. Elution was repeated, eluates were combined and incubated at 70°C for 16-20 hrs together with  
647 input samples collected earlier. Samples were digested with 0.5 mg/ml RNase A (Thermo Fisher  
648 Scientific #EN0531) for 30 min at 55°C and 1 mg/ml Proteinase K for 2 hrs at 55°C. Sample volume  
649 was brought to 200  $\mu$ l and DNA was purified by two phenol/CHCl<sub>3</sub>/isoamyl alcohol (25:24:1) extractions  
650 and ethanol precipitation. DNA was resuspended in 15  $\mu$ l 10 mM Tris, 8.0 and the concentration was  
651 measured using Qubit HS DNA assay (Thermo Fisher Scientific #Q32851).

652

### 653 **Preparation of NGS libraries for ChEC-seq and ChIP-seq samples**

654 NGS libraries for ChEC-seq and ChIP-seq experiments were prepared similarly as described (Donczew  
655 et al., 2020; Warfield et al., 2017). 12  $\mu$ l of ChEC samples and 5  $\mu$ l of ChIP samples was used as input  
656 for library preparation. Samples were end-repaired, phosphorylated and adenylated in 50  $\mu$ l reaction  
657 volume using the following final concentrations: 1X T4 DNA ligase buffer (NEB #B0202S), 0.5 mM each  
658 dNTP (Roche #KK1017), 0.25 mM ATP (NEB #P0756S), 2.5% PEG 4000, 2.5 U T4 PNK (NEB  
659 #M0201S), 0.05 U T4 DNA polymerase (Invitrogen #18005025), and 0.05 U Taq DNA polymerase  
660 (Thermo Fisher Scientific #EP0401). Reactions were incubated at 12°C 15 min, 37°C 15 min, 72°C 20  
661 min, then put on ice and immediately used in adaptor ligation reactions. Adaptor ligation was performed  
662 in a 115  $\mu$ l volume containing 6.5 nM adaptor, 1X Rapid DNA ligase buffer (Enzymatics #B101L) and  
663 3000 U DNA ligase (Enzymatics #L6030-HC-L) and reactions were incubated at 20 deg for 15 min.  
664 Following ligation, a two-step cleanup was performed for ChEC-seq samples using 0.25x vol Mag-Bind  
665 reagent (Omega Biotek # M1378-01) in the first step and 1.1x vol in the second step. In case of ChIP-  
666 seq samples a single cleanup was performed using 0.4x vol Mag-Bind reagent. In both cases DNA was  
667 eluted with 20  $\mu$ l 10 mM Tris, 8.0. Library Enrichment was performed in a 30  $\mu$ l reaction volume  
668 containing 20  $\mu$ l DNA from the previous step and the following final concentrations: 1X KAPA buffer  
669 (Roche #KK2502), 0.3 mM each dNTP (Roche #KK1017), 2.0  $\mu$ M each P5 and P7 PCR primer, and 1

670 U KAPA HS HIFI polymerase (#KK2502). DNA was amplified with the following program: 98°C 45 s,  
671 [98°C 15 s, ramp to 60°C @ 3°C /s, 60°C 10 s, ramp to 98°C @ 3°C /s] 16-18x, 72°C 1 min. 18 cycles  
672 were used for library amplification for ChEC-seq samples and 16 cycles for ChIP-samples. A post-PCR  
673 cleanup was performed using 1.4x vol Mag-Bind reagent and DNA was eluted into 30 µl 10 mM Tris,  
674 8.0. Libraries were sequenced on the Illumina HiSeq2500 platform using 25 bp paired-end reads at the  
675 Fred Hutchinson Cancer Research Center Genomics Shared Resources facility.

676

### 677 **Analysis of NGS data**

678 Data analysis was performed similarly as described (Donczew et al., 2020). The majority of the data  
679 analysis tasks except sequence alignment, read counting and peak calling (described below) were  
680 performed through interactive work in the Jupyter Notebook (<https://jupyter.org>) using Python  
681 programming language (<https://www.python.org>) and short Bash scripts. All figures were generated  
682 using Matplotlib and Seaborn libraries for Python; (<https://matplotlib.org>; <https://seaborn.pydata.org>). All  
683 code snippets and whole notebooks are available upon request.

684

685 Paired-end sequencing reads were aligned to *S. cerevisiae* reference genome (sacCer3), *S. pombe*  
686 reference genome (ASM294v2.20) or *D. melanogaster* reference genome (release 6.06) with  
687 Bowtie(Langmead and Salzberg, 2012) using optional arguments '-l 10 -X 700 --local --very-sensitive-  
688 local --no-unal --no-mixed --no-discordant'. Details of the analysis pipeline depending on the  
689 experimental technique used are described below.

690

### 691 **Analysis of RNA-seq data**

692 SAM files for *S. cerevisiae* data were used as an input for HTseq-count (Anders et al., 2015) with default  
693 settings. The GFF file with *S. cerevisiae* genomic features was downloaded from the Ensembl website  
694 (assembly R64-1-1). Signal per gene was normalized by the number of all *S. pombe* reads mapped for  
695 the sample and multiplied by 10000 (arbitrarily chosen number). Genes classified as dubious,  
696 pseudogenes or transposable elements were excluded leaving 5797 genes for the downstream  
697 analysis. As a next filtering step, we excluded all the genes that had no measurable signal in at least  
698 one out of 42 samples collected in this work. The remaining 5313 genes were used to calculate  
699 coefficient of variation (CV) to validate reproducibility between replicate experiments (**Figures S1D and**  
700 **S4B and Table S2**). This gene set was further compared to a list of 4900 genes we found previously to  
701 provide the best reproducibility with a minimal loss of information(Donczew et al., 2020). The  
702 overlapping set of 4883 genes was used in all plots where genes were divided into TFIID-dependent  
703 and coactivator-redundant (CR) categories. The results of biological replicate experiments for each

704 sample were averaged. Corresponding samples were compared to calculate  $\log_2$  change in expression  
705 per gene (IAA to DMSO samples for degron experiments, and *BDF2* deletion mutant to WT strain  
706 (BY4705)) (**Table S2**).

707

#### 708 **Analysis of ChEC-seq data**

709 SAM files for *S. cerevisiae* data were converted to tag directories with the HOMER  
710 (<http://homer.ucsd.edu> (Heinz et al., 2010)) 'makeTagDirectory' tool. Data for six DMSO treated  
711 replicate samples from experiments involving Bdf1, Bdf2 or Bdf1/2 depletion were used to define  
712 promoters bound by Bdf1, Bdf2, Taf1, Taf11, Med8, Med17 and Spt3 as described below (**Table S4**).  
713 Peaks were called using HOMER 'findPeaks' tool with optional arguments set to '-o auto -C 0 L 2 F 2',  
714 with the free MNase dataset used as a control. These settings use a default false discovery rate (0.1%)  
715 and require peaks to be enriched 2-fold over the control and 2-fold over the local background. Resulting  
716 peak files were converted to BED files using 'pos2bed.pl' program. For each peak, the peak summit  
717 was calculated as a mid-range between peak borders. For peak assignment to promoters the list of all  
718 annotated ORF sequences (excluding sequences classified as 'dubious' or 'pseudogene') was  
719 downloaded from the SGD website (<https://www.yeastgenome.org>). Data for 5888 genes were merged  
720 with TSS positions (Park et al., 2014). If the TSS annotation was missing, TSS was manually assigned  
721 at position -100 bp relative to the start codon. Peaks were assigned to promoters if their peak summit  
722 was in the range from -300 to +100 bp relative to TSS. In a few cases, where more than one peak was  
723 assigned to the particular promoter, the one closer to TSS was used. Promoters bound in at least four  
724 out of six replicate experiments were included in a final list of promoters bound by a given factor and  
725 were used to calculate promoter occupancy in all relevant experiments.

726

727 Coverage at each base pair of the *S. cerevisiae* genome was calculated as the number of reads that  
728 mapped at that position divided by the number of all *D. melanogaster* reads mapped for the sample and  
729 multiplied by 10000 (arbitrarily chosen number). To quantify  $\log_2$  change in factor promoter occupancy  
730 signal per promoter was calculated as a sum of normalized reads per base in a 200 bp window around  
731 the promoter peak summit. Peak summits were defined using Homer as described above. If no peak  
732 was assigned to a promoter using Homer, the position of the strongest signal around TSS was used as  
733 a peak summit. Manual inspection of selected cases confirmed the validity of this approach.  
734 Corresponding IAA and DMSO treated samples were compared to calculate  $\log_2$  change in occupancy  
735 and the results of biological replicate experiments for each sample were averaged (**Table S4**).

736

#### 737 **Analysis of ChIP-seq data**

738 Data for Bdf1 was used to call peaks as described for ChEC-seq with input sample used as a control.  
739 Promoters bound in at least one out of two replicate experiments were included in a final list of Bdf1  
740 bound promoters as defined by ChIP-seq. For all samples coverage at each base pair of the *S.*  
741 *cerevisiae* genome was calculated as the number of reads that mapped at that position divided by the  
742 number of all *S. pombe* reads mapped in the sample, multiplied by the ratio of *S. pombe* to *S. cerevisiae*  
743 reads in the corresponding input sample and multiplied by 10000 (arbitrarily chosen number). The list  
744 of all annotated ORF sequences (excluding sequences classified as ‘dubious’ or ‘pseudogene’) was  
745 downloaded from the SGD website (<https://www.yeastgenome.org>). Data for 5888 genes were merged  
746 with TSS positions obtained from (Park et al., 2014). If the TSS annotation was missing the TSS was  
747 manually assigned at position -100 bp relative to the start codon. Signal per gene was calculated as a  
748 sum of normalized reads per base in a fixed window relative to TSS (defined in figure legends). The  
749 results of biological duplicate experiments for each sample were averaged and the log<sub>2</sub> change in signal  
750 per gene was calculated by comparing corresponding IAA and DMSO treated samples (**Table S4**). In  
751 experiments mapping Rpb1 CTD, Bur1, Ctk1 and Spt5, the signal per gene was calculated between  
752 TSS and PAS (Park et al., 2014) (**Table S5**).

753  
754 FASTQ files for the Bdf1 ChIP-exo (SRR397550) and H3 ChIP-seq (SRR6495880, SRR6495888,  
755 SRR6495913, SRR6495921) experiments were obtained from the SRA. Data were processed as  
756 described above except for the use of RPM normalization. The four datasets for H3 were averaged and  
757 used to normalize H4K12ac data.

### 758 759 **Phylogenetic analysis**

760 Amino acid sequences of yeast and human BET proteins and human Taf1 were downloaded from NCBI  
761 RefSeq database. Positions of individual bromodomains were obtained from (Wu and Chiang, 2007).  
762 Multiple sequence alignment of individual bromodomains was performed using Clustal Omega (Sievers  
763 et al., 2011). Neighbor joining tree was visualized with Jalview v 2.11.1.3 using PAM250 scoring matrix  
764 (Waterhouse et al., 2009).

### 765 766 **Gene ontology analysis**

767 Gene ontology analysis for yeast and human BET regulated genes was done using PANTHER  
768 overrepresentation test and PANTHER GO-Slim Biological Process annotation dataset with default  
769 settings (<http://www.pantherdb.org>; v 16.0) (Mi et al., 2021). Only the most specific, enriched child  
770 processes with FDR < 0.05 were used to compare BET functions between yeast and human model  
771 systems.

772

## 773 **Competing interests**

774 No competing interests declared.

775

## 776 **Acknowledgements**

777 We thank Christine Cucinotta and Sarah Swygert for helpful comments about ChIP-seq experiments,  
778 Toshi Tsukiyama for plasmids, and Sandipan Brahma and all members of the Hahn lab for comments  
779 on manuscript. This work was supported by grants NIH GM053451 and GM075114 to SH and NIH  
780 P30 CA015704 to the Fred Hutch Genomics and Computational Shared Resources facility.

781

## 782 **References**

- 783 Allen BL, Taatjes DJ. 2015. The Mediator complex: a central integrator of transcription. *Nat Rev Mol*  
784 *Cell Biol* **16**:155–166. doi:10.1038/nrm3951
- 785 Anders S, Pyl PT, Huber W. 2015. HTSeq—a Python framework to work with high-throughput  
786 sequencing data. *Bioinforma Oxf Engl* **31**:166–169. doi:10.1093/bioinformatics/btu638
- 787 Badjatia N, Rossi MJ, Bataille AR, Mittal C, Lai WKM, Pugh BF. 2021. Acute stress drives global  
788 repression through two independent RNA polymerase II stalling events in *Saccharomyces*. *Cell*  
789 *Rep* **34**:108640. doi:10.1016/j.celrep.2020.108640
- 790 Bauer K, Berghoff AS, Preusser M, Heller G, Zielinski CC, Valent P, Grunt TW. 2021. Degradation of  
791 BRD4 - a promising treatment approach not only for hematologic but also for solid cancer. *Am*  
792 *J Cancer Res* **11**:530–545.
- 793 Bhagwat AS, Roe J-S, Mok BYL, Hohmann AF, Shi J, Vakoc CR. 2016. BET Bromodomain Inhibition  
794 Releases the Mediator Complex from Select cis-Regulatory Elements. *Cell Rep* **15**:519–530.  
795 doi:10.1016/j.celrep.2016.03.054
- 796 Bruzzone MJ, Grünberg S, Kubik S, Zentner GE, Shore D. 2018. Distinct patterns of histone  
797 acetyltransferase and Mediator deployment at yeast protein-coding genes. *Genes Dev* **32**:1252–  
798 1265. doi:10.1101/gad.312173.118
- 799 Chan LY, Mugler CF, Heinrich S, Vallotton P, Weis K. 2018. Non-invasive measurement of mRNA decay  
800 reveals translation initiation as the major determinant of mRNA stability. *eLife* **7**.  
801 doi:10.7554/eLife.32536
- 802 Chang CS, Pillus L. 2009. Collaboration between the essential Esa1 acetyltransferase and the Rpd3  
803 deacetylase is mediated by H4K12 histone acetylation in *Saccharomyces cerevisiae*. *Genetics*  
804 **183**:149–160. doi:10.1534/genetics.109.103846

- 805 Core L, Adelman K. 2019. Promoter-proximal pausing of RNA polymerase II: a nexus of gene regulation.  
806 *Genes Dev* **33**:960–982. doi:10.1101/gad.325142.119
- 807 Delmore JE, Issa GC, Lemieux ME, Rahl PB, Shi J, Jacobs HM, Kastritis E, Gilpatrick T, Paranal RM,  
808 Qi J, Chesi M, Schinzel AC, McKeown MR, Heffernan TP, Vakoc CR, Bergsagel PL, Ghobrial  
809 IM, Richardson PG, Young RA, Hahn WC, Anderson KC, Kung AL, Bradner JE, Mitsiades CS.  
810 2011. BET bromodomain inhibition as a therapeutic strategy to target c-Myc. *Cell* **146**:904–917.  
811 doi:10.1016/j.cell.2011.08.017
- 812 Devaiah BN, Lewis BA, Cherman N, Hewitt MC, Albrecht BK, Robey PG, Ozato K, Sims RJ, Singer DS.  
813 2012. BRD4 is an atypical kinase that phosphorylates serine2 of the RNA polymerase II carboxy-  
814 terminal domain. *Proc Natl Acad Sci U S A* **109**:6927–6932. doi:10.1073/pnas.1120422109
- 815 Donczew R, Lalou A, Devys D, Tora L, Hahn S. 2021. An improved ChEC-seq method accurately maps  
816 the genome-wide binding of transcription coactivators and sequence-specific transcription  
817 factors. *bioRxiv* 2021.02.12.430999. doi:10.1101/2021.02.12.430999
- 818 Donczew R, Warfield L, Pacheco D, Erijman A, Hahn S. 2020. Two roles for the yeast transcription  
819 coactivator SAGA and a set of genes redundantly regulated by TFIID and SAGA. *eLife*  
820 **9**:e50109. doi:10.7554/eLife.50109
- 821 Durant M, Pugh BF. 2007. NuA4-Directed Chromatin Transactions throughout the *Saccharomyces*  
822 *cerevisiae* Genome. *Mol Cell Biol* **27**:5327–5335. doi:10.1128/MCB.00468-07
- 823 Fu J, Hou J, Liu L, Chen L, Wang M, Shen Y, Zhang Z, Bao X. 2013. Interplay between BDF1 and BDF2  
824 and their roles in regulating the yeast salt stress response. *FEBS J* **280**:1991–2001.  
825 doi:10.1111/febs.12219
- 826 Fujisawa T, Filippakopoulos P. 2017. Functions of bromodomain-containing proteins and their roles in  
827 homeostasis and cancer. *Nat Rev Mol Cell Biol* **18**:246. doi:10.1038/nrm.2016.143
- 828 Gilan O, Rioja I, Knezevic K, Bell MJ, Yeung MM, Harker NR, Lam EYN, Chung C-W, Bamborough P,  
829 Petretich M, Urh M, Atkinson SJ, Bassil AK, Roberts EJ, Vassiliadis D, Burr ML, Preston AGS,  
830 Wellaway C, Werner T, Gray JR, Michon A-M, Gobbetti T, Kumar V, Soden PE, Haynes A,  
831 Vappiani J, Tough DF, Taylor S, Dawson S-J, Bantscheff M, Lindon M, Drewes G, Demont EH,  
832 Daniels DL, Grandi P, Prinjha RK, Dawson MA. 2020. Selective targeting of BD1 and BD2 of  
833 the BET proteins in cancer and immunoinflammation. *Science* **368**:387–394.  
834 doi:10.1126/science.aaz8455
- 835 Goldstein AL, McCusker JH. 1999. Three new dominant drug resistance cassettes for gene disruption  
836 in *Saccharomyces cerevisiae*. *Yeast Chichester Engl* **15**:1541–1553. doi:10.1002/(SICI)1097-  
837 0061(199910)15:14<1541::AID-YEA476>3.0.CO;2-K

- 838 Grünberg S, Henikoff S, Hahn S, Zentner GE. 2016. Mediator binding to UASs is broadly uncoupled  
839 from transcription and cooperative with TFIID recruitment to promoters. *EMBO J* **35**:2435–2446.  
840 doi:10.15252/embj.201695020
- 841 Gyuris A, Donovan DJ, Seymour KA, Lovasco LA, Smilowitz NR, Halperin ALP, Klysik JE, Freiman RN.  
842 2009. The chromatin-targeting protein Brd2 is required for neural tube closure and  
843 embryogenesis. *Biochim Biophys Acta* **1789**:413–421. doi:10.1016/j.bbagr.2009.03.005
- 844 Han X, Yu D, Gu R, Jia Y, Wang Q, Jaganathan A, Yang X, Yu M, Babault N, Zhao C, Yi H, Zhang Q,  
845 Zhou M-M, Zeng L. 2020. Roles of the BRD4 short isoform in phase separation and active gene  
846 transcription. *Nat Struct Mol Biol* **27**:333–341. doi:10.1038/s41594-020-0394-8
- 847 Harlen KM, Churchman LS. 2017. The code and beyond: transcription regulation by the RNA  
848 polymerase II carboxy-terminal domain. *Nat Rev Mol Cell Biol* **18**:263–273.  
849 doi:10.1038/nrm.2017.10
- 850 Heinz S, Benner C, Spann N, Bertolino E, Lin YC, Laslo P, Cheng JX, Murre C, Singh H, Glass CK.  
851 2010. Simple combinations of lineage-determining transcription factors prime cis-regulatory  
852 elements required for macrophage and B cell identities. *Mol Cell* **38**:576–589.  
853 doi:10.1016/j.molcel.2010.05.004
- 854 Huisinga KL, Pugh BF. 2004. A genome-wide housekeeping role for TFIID and a highly regulated stress-  
855 related role for SAGA in *Saccharomyces cerevisiae*. *Mol Cell* **13**:573–585.
- 856 Itzen F, Greifenberg AK, Bösken CA, Geyer M. 2014. Brd4 activates P-TEFb for RNA polymerase II  
857 CTD phosphorylation. *Nucleic Acids Res* **42**:7577–7590. doi:10.1093/nar/gku449
- 858 Jacobson RH, Ladurner AG, King DS, Tjian R. 2000. Structure and function of a human TAFII250  
859 double bromodomain module. *Science* **288**:1422–1425. doi:10.1126/science.288.5470.1422
- 860 Johnson KM, Wang J, Smallwood A, Arayata C, Carey M. 2002. TFIID and human mediator coactivator  
861 complexes assemble cooperatively on promoter DNA. *Genes Dev* **16**:1852–1863.  
862 doi:10.1101/gad.995702
- 863 Joo YJ, Ficarro SB, Soares LM, Chun Y, Marto JA, Buratowski S. 2017. Downstream promoter  
864 interactions of TFIID TAFs facilitate transcription reinitiation. *Genes Dev* **31**:2162–2174.  
865 doi:10.1101/gad.306324.117
- 866 Kanno T, Kanno Y, LeRoy G, Campos E, Sun H-W, Brooks SR, Vahedi G, Heightman TD, Garcia BA,  
867 Reinberg D, Siebenlist U, O’Shea JJ, Ozato K. 2014. BRD4 assists elongation of both coding  
868 and enhancer RNAs by interacting with acetylated histones. *Nat Struct Mol Biol* **21**:1047–1057.  
869 doi:10.1038/nsmb.2912
- 870 Khoueiry P, Ward Gahlawat A, Petretich M, Michon AM, Simola D, Lam E, Furlong EE, Benes V,  
871 Dawson MA, Prinjha RK, Drewes G, Grandi P. 2019. BRD4 bimodal binding at promoters and

- 872 drug-induced displacement at Pol II pause sites associates with I-BET sensitivity. *Epigenetics*  
873 *Chromatin* **12**:39. doi:10.1186/s13072-019-0286-5
- 874 Knoll ER, Zhu ZI, Sarkar D, Landsman D, Morse RH. 2018. Role of the pre-initiation complex in Mediator  
875 recruitment and dynamics. *eLife* **7**:e39633. doi:10.7554/eLife.39633
- 876 Koerber RT, Rhee HS, Jiang C, Pugh BF. 2009. Interaction of transcriptional regulators with specific  
877 nucleosomes across the *Saccharomyces* genome. *Mol Cell* **35**:889–902.  
878 doi:10.1016/j.molcel.2009.09.011
- 879 Krogan NJ, Keogh M-C, Datta N, Sawa C, Ryan OW, Ding H, Haw RA, Pootoolal J, Tong A, Canadien  
880 V, Richards DP, Wu X, Emili A, Hughes TR, Buratowski S, Greenblatt JF. 2003. A Snf2 family  
881 ATPase complex required for recruitment of the histone H2A variant Htz1. *Mol Cell* **12**:1565–  
882 1576. doi:10.1016/s1097-2765(03)00497-0
- 883 Ladurner AG, Inouye C, Jain R, Tjian R. 2003. Bromodomains Mediate an Acetyl-Histone Encoded  
884 Antisilencing Function at Heterochromatin Boundaries. *Mol Cell* **11**:365–376.  
885 doi:10.1016/S1097-2765(03)00035-2
- 886 Lambert J-P, Picaud S, Fujisawa T, Hou H, Savitsky P, Uusküla-Reimand L, Gupta GD, Abdouni H, Lin  
887 Z-Y, Tucholska M, Knight JDR, Gonzalez-Badillo B, St-Denis N, Newman JA, Stucki M, Pelletier  
888 L, Bandeira N, Wilson MD, Filippakopoulos P, Gingras A-C. 2019. Interactome Rewiring  
889 Following Pharmacological Targeting of BET Bromodomains. *Mol Cell* **73**:621-638.e17.  
890 doi:10.1016/j.molcel.2018.11.006
- 891 Langmead B, Salzberg SL. 2012. Fast gapped-read alignment with Bowtie 2. *Nat Methods* **9**:357–359.  
892 doi:10.1038/nmeth.1923
- 893 Lauberth SM, Nakayama T, Wu X, Ferris A, Tang Z, Hughes SH, Roeder RG. 2013. H3K4me3  
894 Interactions with TAF3 Regulate Preinitiation Complex Assembly and Selective Gene Activation.  
895 *Cell* **152**:1021–1036. doi:10.1016/j.cell.2013.01.052
- 896 Lovén J, Hoke HA, Lin CY, Lau A, Orlando DA, Vakoc CR, Bradner JE, Lee TI, Young RA. 2013.  
897 Selective inhibition of tumor oncogenes by disruption of super-enhancers. *Cell* **153**:320–334.  
898 doi:10.1016/j.cell.2013.03.036
- 899 Matangkasombut O, Buratowski RM, Swilling NW, Buratowski S. 2000. Bromodomain factor 1  
900 corresponds to a missing piece of yeast TFIID. *Genes Dev* **14**:951–962.
- 901 Matangkasombut O, Buratowski S. 2003. Different sensitivities of bromodomain factors 1 and 2 to  
902 histone H4 acetylation. *Mol Cell* **11**:353–363.
- 903 Mi H, Ebert D, Muruganujan A, Mills C, Albou L-P, Mushayamaha T, Thomas PD. 2021. PANTHER  
904 version 16: a revised family classification, tree-based classification tool, enhancer regions and  
905 extensive API. *Nucleic Acids Res* **49**:D394–D403. doi:10.1093/nar/gkaa1106



- 906 Muhar M, Ebert A, Neumann T, Umkehrer C, Jude J, Wieshofer C, Rescheneder P, Lipp JJ, Herzog  
907 VA, Reichholf B, Cisneros DA, Hoffmann T, Schlapansky MF, Bhat P, von Haeseler A, Köcher  
908 T, Obenauf AC, Popow J, Ameres SL, Zuber J. 2018. SLAM-seq defines direct gene-regulatory  
909 functions of the BRD4-MYC axis. *Science* **360**:800–805. doi:10.1126/science.aao2793
- 910 Nguyen VQ, Ranjan A, Liu S, Tang X, Ling YH, Wisniewski J, Mizuguchi G, Li KY, Jou V, Zheng Q,  
911 Lavis LD, Lionnet T, Wu C. 2020. Spatio-Temporal Coordination of Transcription Preinitiation  
912 Complex Assembly in Live Cells. *bioRxiv* 2020.12.30.424853. doi:10.1101/2020.12.30.424853
- 913 Nishimura K, Fukagawa T, Takisawa H, Kakimoto T, Kanemaki M. 2009. An auxin-based degron system  
914 for the rapid depletion of proteins in nonplant cells. *Nat Methods* **6**:917–922.  
915 doi:10.1038/nmeth.1401
- 916 Oberbeckmann E, Wolff M, Krietenstein N, Heron M, Ellins JL, Schmid A, Krebs S, Blum H, Gerland U,  
917 Korber P. 2019. Absolute nucleosome occupancy map for the *Saccharomyces cerevisiae*  
918 genome. *Genome Res* **29**:1996–2009. doi:10.1101/gr.253419.119
- 919 Park D, Morris AR, Battenhouse A, Iyer VR. 2014. Simultaneous mapping of transcript ends at single-  
920 nucleotide resolution and identification of widespread promoter-associated non-coding RNA  
921 governed by TATA elements. *Nucleic Acids Res* **42**:3736–3749. doi:10.1093/nar/gkt1366
- 922 Patel AB, Greber BJ, Nogales E. 2020. Recent insights into the structure of TFIID, its assembly, and its  
923 binding to core promoter. *Curr Opin Struct Biol* **61**:17–24. doi:10.1016/j.sbi.2019.10.001
- 924 Rabani M, Levin JZ, Fan L, Adiconis X, Raychowdhury R, Garber M, Gnirke A, Nusbaum C, Hacohen  
925 N, Friedman N, Amit I, Regev A. 2011. Metabolic labeling of RNA uncovers principles of RNA  
926 production and degradation dynamics in mammalian cells. *Nat Biotechnol* **29**:436–442.  
927 doi:10.1038/nbt.1861
- 928 Rahl PB, Lin CY, Seila AC, Flynn RA, McCuine S, Burge CB, Sharp PA, Young RA. 2010. c-Myc  
929 regulates transcriptional pause release. *Cell* **141**:432–445. doi:10.1016/j.cell.2010.03.030
- 930 Rahman S, Sowa ME, Ottinger M, Smith JA, Shi Y, Harper JW, Howley PM. 2011. The Brd4  
931 extraterminal domain confers transcription activation independent of pTEFb by recruiting  
932 multiple proteins, including NSD3. *Mol Cell Biol* **31**:2641–2652. doi:10.1128/MCB.01341-10
- 933 Rhee HS, Pugh BF. 2012. Genome-wide structure and organization of eukaryotic pre-initiation  
934 complexes. *Nature* **483**:295–301. doi:10.1038/nature10799
- 935 Sabari BR, Dall’Agnese A, Boija A, Klein IA, Coffey EL, Shrinivas K, Abraham BJ, Hannett NM, Zamudio  
936 AV, Manteiga JC, Li CH, Guo YE, Day DS, Schuijers J, Vasile E, Malik S, Hnisz D, Lee TI, Cisse  
937 II, Roeder RG, Sharp PA, Chakraborty AK, Young RA. 2018. Coactivator condensation at super-  
938 enhancers links phase separation and gene control. *Science* **361**. doi:10.1126/science.aar3958
- 939 Sanders SL, Jennings J, Canutescu A, Link AJ, Weil PA. 2002. Proteomics of the Eukaryotic  
940 Transcription Machinery: Identification of Proteins Associated with Components of Yeast TFIID

- 941 by Multidimensional Mass Spectrometry. *Mol Cell Biol* **22**:4723–4738.  
942 doi:10.1128/MCB.22.13.4723-4738.2002
- 943 Sdelci S, Lardeau C-H, Tallant C, Klepsch F, Klaiber B, Bennett J, Rathert P, Schuster M, Penz T,  
944 Fedorov O, Superti-Furga G, Bock C, Zuber J, Huber KVM, Knapp S, Müller S, Kubicek S. 2016.  
945 Mapping the chemical chromatin reactivation landscape identifies BRD4-TAF1 cross-talk. *Nat*  
946 *Chem Biol* **12**:504–510. doi:10.1038/nchembio.2080
- 947 Shetty A, Kallgren SP, Demel C, Maier KC, Spatt D, Alver BH, Cramer P, Park PJ, Winston F. 2017.  
948 Spt5 plays vital roles in the control of sense and antisense transcription elongation. *Mol Cell*  
949 **66**:77-88.e5. doi:10.1016/j.molcel.2017.02.023
- 950 Sievers F, Wilm A, Dineen D, Gibson TJ, Karplus K, Li W, Lopez R, McWilliam H, Remmert M, Söding  
951 J, Thompson JD, Higgins DG. 2011. Fast, scalable generation of high-quality protein multiple  
952 sequence alignments using Clustal Omega. *Mol Syst Biol* **7**:539. doi:10.1038/msb.2011.75
- 953 Slaughter MJ, Shanle EK, Khan A, Chua KF, Hong T, Boxer LD, Allis CD, Josefowicz SZ, Garcia BA,  
954 Rothbart SB, Strahl BD, Davis IJ. 2021. HDAC inhibition results in widespread alteration of the  
955 histone acetylation landscape and BRD4 targeting to gene bodies. *Cell Rep* **34**:108638.  
956 doi:10.1016/j.celrep.2020.108638
- 957 Stathis A, Bertoni F. 2018. BET Proteins as Targets for Anticancer Treatment. *Cancer Discov* **8**:24–36.  
958 doi:10.1158/2159-8290.CD-17-0605
- 959 Stonestrom AJ, Hsu SC, Jahn KS, Huang P, Keller CA, Giardine BM, Kadauke S, Campbell AE, Evans  
960 P, Hardison RC, Blobel GA. 2015. Functions of BET proteins in erythroid gene expression. *Blood*  
961 **125**:2825–2834. doi:10.1182/blood-2014-10-607309
- 962 Suka N, Suka Y, Carmen AA, Wu J, Grunstein M. 2001. Highly specific antibodies determine histone  
963 acetylation site usage in yeast heterochromatin and euchromatin. *Mol Cell* **8**:473–479.  
964 doi:10.1016/s1097-2765(01)00301-x
- 965 Uhlén M, Fagerberg L, Hallström BM, Lindskog C, Oksvold P, Mardinoglu A, Sivertsson Å, Kampf C,  
966 Sjöstedt E, Asplund A, Olsson I, Edlund K, Lundberg E, Navani S, Szigartyo CA-K, Odeberg J,  
967 Djureinovic D, Takanen JO, Hober S, Alm T, Edqvist P-H, Berling H, Tegel H, Mulder J,  
968 Rockberg J, Nilsson P, Schwenk JM, Hamsten M, von Feilitzen K, Forsberg M, Persson L,  
969 Johansson F, Zwahlen M, von Heijne G, Nielsen J, Pontén F. 2015. Proteomics. Tissue-based  
970 map of the human proteome. *Science* **347**:1260419. doi:10.1126/science.1260419
- 971 van Ingen H, van Schaik FMA, Wienk H, Ballering J, Rehmann H, Dechesne AC, Kruijzer JAW, Liskamp  
972 RMJ, Timmers HTM, Boelens R. 2008. Structural insight into the recognition of the H3K4me3  
973 mark by the TFIID subunit TAF3. *Struct Lond Engl* **1993** **16**:1245–1256.  
974 doi:10.1016/j.str.2008.04.015

- 975 Wang N, Wu R, Tang D, Kang R. 2021. The BET family in immunity and disease. *Signal Transduct*  
976 *Target Ther* **6**:1–22. doi:10.1038/s41392-020-00384-4
- 977 Warfield L, Ramachandran S, Baptista T, Devys D, Tora L, Hahn S. 2017. Transcription of Nearly All  
978 Yeast RNA Polymerase II-Transcribed Genes Is Dependent on Transcription Factor TFIID. *Mol*  
979 *Cell* **68**:118–129.e5. doi:10.1016/j.molcel.2017.08.014
- 980 Waterhouse AM, Procter JB, Martin DMA, Clamp M, Barton GJ. 2009. Jalview Version 2—a multiple  
981 sequence alignment editor and analysis workbench. *Bioinformatics* **25**:1189–1191.  
982 doi:10.1093/bioinformatics/btp033
- 983 Winter GE, Mayer A, Buckley DL, Erb MA, Roderick JE, Vittori S, Reyes JM, di Iulio J, Souza A, Ott CJ,  
984 Roberts JM, Zeid R, Scott TG, Paulk J, Lachance K, Olson CM, Dastjerdi S, Bauer S, Lin CY,  
985 Gray NS, Kelliher MA, Churchman LS, Bradner JE. 2017. BET Bromodomain Proteins Function  
986 as Master Transcription Elongation Factors Independent of CDK9 Recruitment. *Mol Cell* **67**:5-  
987 18.e19. doi:10.1016/j.molcel.2017.06.004
- 988 Wu S-Y, Chiang C-M. 2007. The Double Bromodomain-containing Chromatin Adaptor Brd4 and  
989 Transcriptional Regulation. *J Biol Chem* **282**:13141–13145. doi:10.1074/jbc.R700001200
- 990 Wu S-Y, Zhou T, Chiang C-M. 2003. Human mediator enhances activator-facilitated recruitment of RNA  
991 polymerase II and promoter recognition by TATA-binding protein (TBP) independently of TBP-  
992 associated factors. *Mol Cell Biol* **23**:6229–6242. doi:10.1128/mcb.23.17.6229-6242.2003
- 993 Zencir S, Dilg D, Rueda MP, Shore D, Albert B. 2020. Mechanisms coordinating ribosomal protein gene  
994 transcription in response to stress. *Nucleic Acids Res* **48**:11408–11420.  
995 doi:10.1093/nar/gkaa852
- 996 Zentner GE, Kasinathan S, Xin B, Rohs R, Henikoff S. 2015. ChEC-seq kinetics discriminates  
997 transcription factor binding sites by DNA sequence and shape in vivo. *Nat Commun* **6**:8733.  
998 doi:10.1038/ncomms9733
- 999 Zhang H, Roberts DN, Cairns BR. 2005. Genome-wide dynamics of Htz1, a histone H2A variant that  
1000 poises repressed/basal promoters for activation through histone loss. *Cell* **123**:219–231.  
1001 doi:10.1016/j.cell.2005.08.036
- 1002 Zheng B, Aoi Y, Shah AP, Iwanaszko M, Das S, Rendleman EJ, Zha D, Khan N, Smith ER, Shilatifard  
1003 A. 2021. Acute perturbation strategies in interrogating RNA polymerase II elongation factor  
1004 function in gene expression. *Genes Dev*. doi:10.1101/gad.346106.120
- 1005 Zuber J, Shi J, Wang E, Rappaport AR, Herrmann H, Sison EA, Magoon D, Qi J, Blatt K, Wunderlich  
1006 M, Taylor MJ, Johns C, Chicas A, Mulloy JC, Kogan SC, Brown P, Valent P, Bradner JE, Lowe  
1007 SW, Vakoc CR. 2011. RNAi screen identifies Brd4 as a therapeutic target in acute myeloid  
1008 leukaemia. *Nature* **478**:524–528. doi:10.1038/nature10334
- 1009

1010
